# Supplementary material for: Sex-Dependent Variation of Pumpkin (Cucurbita maxima cv. Big Max) Nectar and Nectaries as Determined by Proteomics and Metabolomics
Source: Front Plant Sci. 2018 Jun 29;9:860. doi: 10.3389/fpls.2018.00860 (PMC6034135; doi:10.3389/fpls.2018.00860)
Supplement: Supplementary file 4 [file Data_Sheet_4.XLSX]

## Sheet: Sheet1
Supplementary Table 4	Protein to GO mapping of Cucurbita maxima nectary proteins
Identified Protein	Accession Number	Species	Molecular Weight	Mann Whitney Adjusted P Value	Log2FC male/ female	GO ID	Ontology
ATP synthase subunit beta	F6GTT2_VITVI	Vitis vinifera	59 kDa	1	-0.19	GO:0006754, GO:0099132, GO:0046034, GO:0015986, GO:0015992	Biological process
Heat shock protein 70	Q9M4E7_CUCSA	Cucumis sativus	71 kDa	0.038	0.23	GO:0042149, GO:0034605, GO:0035437, GO:0043066, GO:0055114, GO:0009860, GO:0030335, GO:0006457, GO:0006616, GO:0021762	Biological process
Alpha-1,4 glucan phosphorylase	B2DG14_CUCMA	Cucurbita maxima	96 kDa	0.39	0.08	GO:0005975, GO:0005980, GO:0046686, GO:0009414	Biological process
Polyubiquitin (Fragment)	UBIQP_ACECL	Acetabularia cliftonii	47 kDa	0.25	0.48	GO:0009693, GO:0045116, GO:0009733, GO:0006511	Biological process
Glyceraldehyde-3-phosphate dehydrogenase	G3PC_SINAL	Sinapis alba	37 kDa	0.54	-0.18	GO:0006006, GO:0006096, GO:0055114	Biological process
ATP synthase subunit alpha	Q8SID6_9ERIC	Palaquium formosanum	43 kDa	0.77	-0.01	GO:0099132, GO:0046034, GO:0015986, GO:0015992	Biological process
Heat shock protein 90-1	B6EBD7_SOYBN	Glycine max	80 kDa	0.36	0.12	GO:0061077, GO:0006952, GO:0042742, GO:0009816, GO:0045087	Biological process
Uncharacterized protein	I1LXY1_SOYBN	Glycine max	89 kDa	0.54	0.06	GO:0008652, GO:0050667, GO:0009086, GO:0032259	Biological process
Predicted protein	A9P8Q7_POPTR	Populus trichocarpa	29 kDa	0.43	0.29	GO:0009742, GO:0016049, GO:0042742, GO:0000184, GO:0090305, GO:0046686, GO:0010266, GO:0090378, GO:0007165	Biological process
Alkaline alpha galactosidase 3	H6WX41_CUCSA	Cucumis sativus	86 kDa	0.092	-0.35	GO:0005975, GO:0034484, GO:0080167, GO:0006979	Biological process
Putative uncharacterized protein (enolase were in cluster)	D7T227_VITVI	Vitis vinifera	48 kDa	0.21	-0.34	GO:0006096	Biological process
Adenine nucleotide translocator	E5GB77_CUCME	Cucumis melo subsp. melo	42 kDa	0.084	-0.81	GO:0015866, GO:0015867, GO:0046902, GO:0009409, GO:0009651, GO:0055085	Biological process
Malate dehydrogenase (Fragment)	A1BQK6_CUCSA	Cucumis sativus	14 kDa	0.7	0.03	GO:0005975, GO:0006108, GO:0006734, GO:0006107, GO:0055114, GO:0006099	Biological process
UDP-glucose pyrophosphorylase	Q19TV8_CUCME	Cucumis melo	52 kDa	0.6	-0.03	GO:0006011	Biological process
Aconitate hydratase, cytoplasmic	ACOC_CUCMA	Cucurbita maxima	98 kDa	0.88	-0.03	GO:0006101, GO:0006097, GO:0006102, GO:0009737, GO:0046686, GO:1990641, GO:0006979, GO:0009651, GO:0090351, GO:0006099	Biological process
Fructose-bisphosphate aldolase	K4D3E4_SOLLC	Solanum lycopersicum	38 kDa	0.32	0.2	GO:0006096	Biological process
Phosphorylase	B2DG13_CUCMA	Cucurbita maxima	109 kDa	0.0059	0.2	GO:0005975	Biological process
Chaperonin CPN60-2, mitochondrial	CH62_CUCMA	Cucurbita maxima	61 kDa	0.04	-0.88	GO:0061077, GO:0006458, GO:0045041, GO:0042026	Biological process
Uncharacterized protein	K7MS29_SOYBN	Glycine max	164 kDa	0.078	-0.28	GO:0005975, GO:0009631, GO:0018106, GO:0016310, GO:0009610, GO:0005983	Biological process
Putative uncharacterized protein	F6HQQ7_VITVI	Vitis vinifera	112 kDa	0.89	-0.24	GO:0005977	Biological process
4-alpha-glucanotransferase, putative	B9SCF0_RICCO	Ricinus communis	104 kDa	0.44	-0.22	GO:0005977	Biological process
Glucose-6-phosphate isomerase	E0CQ39_VITVI	Vitis vinifera	63 kDa	1	-0.17	GO:0006094, GO:0006096	Biological process
Peptidyl-prolyl cis-trans isomerase	G3CU70_MOMCH	Momordica charantia	18 kDa	1	-0.03	GO:0006457, GO:0000413	Biological process
Hexokinase 1	B6V3C0_CUCME	Cucumis melo	54 kDa	0.89	-0.1	GO:0005975, GO:0046835, GO:0001678, GO:0051156, GO:0010255, GO:0006096, GO:0019320, GO:0016310, GO:0012501, GO:0009750, GO:0090332, GO:0010182, GO:0010148	Biological process
Galactokinase	B6V3B9_CUCME	Cucumis melo	55 kDa	0.13	-0.28	GO:0046835, GO:0006012, GO:0008152	Biological process
Putative uncharacterized protein	D8R6D5_SELML	Selaginella moellendorffii	68 kDa	0.44	0.62	GO:0006457	Biological process
Heat shock 70 kDa protein, mitochondrial	HSP7M_PHAVU	Phaseolus vulgaris	73 kDa	0.0042	0.4	GO:0006457	Biological process
2,3-bisphosphoglycerate-independent phosphoglycerate mutase	PMGI_RICCO	Ricinus communis	61 kDa	0.28	-0.19	GO:0006007, GO:0006096, GO:0008152	Biological process
Malate dehydrogenase	A8MQK3_ARATH	Arabidopsis thaliana	33 kDa	0.82	0.01	GO:0005975, GO:0019752, GO:0042742, GO:0006108, GO:0055114, GO:0006099	Biological process
Putative uncharacterized protein	A5AQD0_VITVI	Vitis vinifera	12 kDa	0.12	0.67	GO:0055114	Biological process
Elongation factor EF-2	G7IH33_MEDTR	Medicago truncatula	94 kDa	0.068	-0.2	GO:0006412, GO:0006414	Biological process
Putative uncharacterized protein	A5AEB9_VITVI	Vitis vinifera	45 kDa	0.043	-0.23	GO:1901800, GO:0045899, GO:0030433	Biological process
26S protease regulatory subunit 6B homolog	PRS6B_ARATH	Arabidopsis thaliana	46 kDa	0.16	-0.16	GO:1901800, GO:0045899, GO:0030163, GO:0030433	Biological process
Actin 1	M4WH59_DIOMU	Dionaea muscipula	42 kDa	0.65	0.1	NA	Biological process
UDP-glucose 4-epimerase 5	UGE5_ARATH	Arabidopsis thaliana	39 kDa	0.92	-0.06	GO:0005975, GO:0006012	Biological process
Putative eukaryotic translation initiation factor 4A (Fragment)	Q5K406_9CARY	Silene viscosa	19 kDa	0.78	-0.1	GO:0006413	Biological process
Mitochondrial processing peptidase beta subunit	Q9AXQ2_CUCME	Cucumis melo	59 kDa	0.011	-0.37	GO:0009060, GO:0006122, GO:0016485, GO:0006508	Biological process
Glutathione S-transferase	Q8GT24_CUCMA	Cucurbita maxima	23 kDa	0.016	0.26	NA	Biological process
Predicted protein	A9RP29_PHYPA	Physcomitrella patens subsp. patens	24 kDa	0.58	-0.66	GO:0006730, GO:0019510, GO:0033353	Biological process
D-3-phosphoglycerate dehydrogenase, putative	B9RYA3_RICCO	Ricinus communis	63 kDa	0.39	-0.95	GO:0008652, GO:0009793, GO:0006564, GO:0009561, GO:0055114, GO:0009555	Biological process
Probable sucrose-phosphate synthase 2	SPSA2_CRAPL	Craterostigma plantagineum	121 kDa	0.87	0.04	GO:0071836, GO:0005986	Biological process
Annexin	E5GCK3_CUCME	Cucumis melo subsp. melo	72 kDa	0.027	-0.26	NA	Biological process
Histone H2B	A2IBL2_NICBE	Nicotiana benthamiana	16 kDa	0.25	0.2	NA	Biological process
Predicted protein	B9MTE3_POPTR	Populus trichocarpa	90 kDa	0.8	-0.02	GO:0007049, GO:0051301, GO:0015031	Biological process
Mitochondrial phosphate carrier protein, putative	B9RH00_RICCO	Ricinus communis	39 kDa	0.053	-0.91	GO:0006839, GO:0035435, GO:0006817, GO:0009651, GO:0055085	Biological process
Putative uncharacterized protein	D7TFJ4_VITVI	Vitis vinifera	48 kDa	0.1	0.36	GO:0005975, GO:0006098	Biological process
Pyruvate kinase	D7LUD2_ARALL	Arabidopsis lyrata subsp. lyrata	57 kDa	0.024	-0.47	GO:0006096, GO:0016310, GO:0046686	Biological process
Thioredoxin	Q8H9E2_CUCMA	Cucurbita maxima	13 kDa	0.09	0.56	GO:0045454, GO:0006662, GO:0055114	Biological process
Uncharacterized protein	M5XRY7_PRUPE	Prunus persica	52 kDa	0.016	-0.36	GO:0000272, GO:0009414, GO:0005983	Biological process
Beta-amylase	F6HS29_VITVI	Vitis vinifera	52 kDa	0.78	-0.04	GO:0005975, GO:0008152, GO:0000272	Biological process
Predicted protein	B9HCM7_POPTR	Populus trichocarpa	48 kDa	0.18	0.22	GO:1901800, GO:0045899, GO:0030433	Biological process
Phenylalanine ammonia-lyase	PALY_CAMSI	Camellia sinensis	78 kDa	0.00046	1.24	GO:0009800, GO:0006559	Biological process
Predicted protein (Ferredoxin--NADP reductase, root isozyme, chloroplastic)	B9GG14_POPTR	Populus trichocarpa	42 kDa	0.073	0.96	GO:0055114, GO:0015979	Biological process
Isocitrate dehydrogenase [NADP]	P93133_EUCGL	Eucalyptus globulus	47 kDa	0.7	-0.29	GO:0006952, GO:0042742, GO:0006097, GO:0006102, GO:0006739, GO:0055114, GO:0046686, GO:0009651, GO:0010043, GO:0006099	Biological process
Uncharacterized protein	M0TLV9_MUSAM	Musa acuminata subsp. malaccensis	111 kDa	0.52	0.09	GO:0008152, GO:0055114, GO:0006099	Biological process
Dihydrolipoyl dehydrogenase	D2D319_GOSHI	Gossypium hirsutum	54 kDa	0.7	0.05	GO:0045454, GO:0055114	Biological process
Elongation factor 1-alpha	EF1A_TOBAC	Nicotiana tabacum	49 kDa	0.89	0.05	GO:0006412, GO:0006414	Biological process
Phosphoglycerate kinase	I6LNT9_HELAN	Helianthus annuus	42 kDa	0.56	0.06	GO:0006096, GO:0016310, GO:0019253	Biological process
Fructose-bisphosphate aldolase	A9PEU6_POPTR	Populus trichocarpa	42 kDa	0.39	0.06	GO:0006096	Biological process
Uncharacterized protein	K4D5V2_SOLLC	Solanum lycopersicum	80 kDa	0.053	0.23	GO:0042773, GO:0045333, GO:0055114, GO:0006979	Biological process
NADH-ubiquinone oxidoreductase, putative	B9T118_RICCO	Ricinus communis	81 kDa	0.44	-0.33	GO:0042773, GO:0055114	Biological process
Poly(A)-binding protein	Q9M549_CUCSA	Cucumis sativus	71 kDa	0.031	0.3	NA	Biological process
Heat shock protein 90	D0EWD6_IPONI	Ipomoea nil	90 kDa	0.53	0.01	GO:0006457, GO:0006950	Biological process
Uncharacterized protein	M5W737_PRUPE	Prunus persica	64 kDa	0.44	0.15	GO:0042026	Biological process
Chaperonin 60 subunit beta 1, chloroplastic	CPNB1_ARATH	Arabidopsis thaliana	64 kDa	0.74	-0.02	GO:0008219, GO:0051085, GO:0007005, GO:0042026, GO:0009409, GO:0009627	Biological process
6-phosphogluconate dehydrogenase, decarboxylating	B9VWD5_CUCSA	Cucumis sativus	54 kDa	0.3	-0.13	GO:0019521, GO:0080173, GO:0055114, GO:0006098, GO:0009651	Biological process
Cluster of Proton-translocating inorganic pyrophosphatase OS=Cucurbita moschata GN=PHP-1 PE=2 SV=1 (O82680_CUCMO)	O82680_CUCMO	Cucurbita moschata	81 kDa	0.053	-0.58	GO:0015992, GO:0055085	Biological process
Pyrophosphate-energized vacuolar membrane proton pump, putative	B9SXN6_RICCO	Ricinus communis	80 kDa	0.12	-0.55	GO:0055114, GO:0015992, GO:0055085	Biological process
DnaJ protein homolog	DNJH_CUCSA	Cucumis sativus	46 kDa	0.047	0.31	GO:0006457, GO:0009408	Biological process
Predicted protein	B9GKF8_POPTR	Populus trichocarpa	104 kDa	0.26	0.16	GO:0043171, GO:0006508	Biological process
Pyruvate kinase	I3STS9_LOTJA	Lotus japonicus	55 kDa	0.06	-0.14	GO:0006096, GO:0016310	Biological process
2,3-bisphosphoglycerate-independent phosphoglycerate mutase	PMGI_MESCR	Mesembryanthemum crystallinum	61 kDa	1	-0.01	GO:0006007, GO:0006096, GO:0008152	Biological process
Phosphoenolpyruvate carboxylase protein	J9Y1K3_CUCSA	Cucumis sativus	110 kDa	0.032	-0.49	GO:0015977, GO:0048366, GO:0008152, GO:0015979, GO:0015979, GO:0006099	Biological process
Uncharacterized protein	K4DF81_SOLLC	Solanum lycopersicum	36 kDa	1	0.05	GO:0042776, GO:0006122	Biological process
Translationally-controlled tumor protein homolog	TCTP_CUCMA	Cucurbita maxima	19 kDa	0.64	0.06	NA	Biological process
Plasma membrane proton pump	B3VDR8_CUCSA	Cucumis sativus	105 kDa	0.025	-0.25	GO:0006754, GO:0015991, GO:0006811, GO:0015992, GO:0010119, GO:0009737, GO:0009414, GO:1990069	Biological process
Enoyl-ACP reductase 1-1	D8KXZ6_ARAHY	Arachis hypogaea	41 kDa	0.89	0.09	NA	Biological process
Predicted protein	A9RJ42_PHYPA	Physcomitrella patens subsp. patens	50 kDa	0.053	0.28	GO:1901800, GO:0045899, GO:0030433	Biological process
Phosphoenolpyruvate carboxykinase [ATP], putative	B9R6Q4_RICCO	Ricinus communis	73 kDa	0.0072	-0.73	GO:0006094, GO:0016310	Biological process
Putative uncharacterized protein	D7SJV2_VITVI	Vitis vinifera	43 kDa	0.7	0.01	NA	Biological process
EBP1	A0FH76_SOLTU	Solanum tuberosum	43 kDa	0.25	0.18	NA	Biological process
Ras-related protein RAB1BV	RB1BV_BETVU	Beta vulgaris	24 kDa	0.44	-0.31	GO:0090114, GO:0034498, GO:0032456, GO:0006888, GO:0048211, GO:0016236, GO:1990261, GO:0034497, GO:0009306, GO:1900101, GO:0017157, GO:0043549, GO:0061709, GO:0035493, GO:0035494, GO:0006904	Biological process
Uncharacterized protein	M5X008_PRUPE	Prunus persica	37 kDa	0.67	-0.49	GO:0019752, GO:0055114	Biological process
Uncharacterized protein	M0T7L5_MUSAM	Musa acuminata subsp. malaccensis	106 kDa	0.12	1.01	GO:0019538	Biological process
Chaperone protein ClpB3, chloroplastic	CLPB3_ARATH	Arabidopsis thaliana	109 kDa	0.15	0.23	GO:0009658, GO:0016485, GO:0009408	Biological process
Clathrin heavy chain, putative	B9SQP2_RICCO	Ricinus communis	193 kDa	0.0033	-0.26	GO:0048268, GO:0006897, GO:0006886	Biological process
Aspartic proteinase	ASPR_CUCPE	Cucurbita pepo	56 kDa	0.01	0.24	GO:0006629, GO:0006508	Biological process
Calmodulin	CALM_WHEAT	Triticum aestivum	17 kDa	0.011	0.41	NA	Biological process
40S ribosomal protein S3, putative	B9RK17_RICCO	Ricinus communis	26 kDa	1	0.16	GO:0002181, GO:0006281, GO:0009651, GO:0006412	Biological process
Citrate synthase	I3NNW9_PAESU	Paeonia suffruticosa	53 kDa	0.52	0.02	GO:0006101, GO:0006099	Biological process
4-alpha-glucanotransferase DPE2	DPE2_ORYSJ	Oryza sativa subsp. japonica	108 kDa	0.42	-0.11	GO:0005977, GO:0000025	Biological process
Short-chain dehydrogenase/reductase	E5GBL0_CUCME	Cucumis melo subsp. melo	108 kDa	0.063	-0.15	GO:0031047	Biological process
Uncharacterized protein	I1K5M9_SOYBN	Glycine max	64 kDa	0.0072	-0.46	GO:0009590, GO:0019388, GO:0006006, GO:0005978, GO:0071704, GO:0019252	Biological process
Phosphoglucomutase, cytoplasmic	PGMC_SOLTU	Solanum tuberosum	63 kDa	0.12	-0.93	GO:0005975, GO:0006006, GO:0071704	Biological process
RuBisCO large subunit-binding protein subunit alpha (Fragment)	RUBA_RICCO	Ricinus communis	52 kDa	0.92	-0.78	GO:0061077, GO:0009658, GO:0006458, GO:0009793, GO:0007005, GO:0042026	Biological process
S-adenosylmethionine synthetase 1	B9HIH9_POPTR	Populus trichocarpa	43 kDa	0.82	0.01	GO:0006730, GO:0006556	Biological process
UDP-sugar pyrophosphorylase	USP_CUCME	Cucumis melo	68 kDa	0.59	-0.66	GO:0009226, GO:0009555, GO:0046686, GO:0052573, GO:0006011, GO:0046398, GO:0033356	Biological process
40S ribosomal protein S5-1	RS51_ARATH	Arabidopsis thaliana	23 kDa	0.48	-0.26	GO:0009735, GO:0000028, GO:0006412	Biological process
Peptidyl-prolyl cis-trans isomerase	CYPH_CATRO	Catharanthus roseus	18 kDa	0.88	0.02	GO:0006457, GO:0000413	Biological process
Uncharacterized protein (Adenylosuccinate synthetase, chloroplastic )	M5WBP0_PRUPE	Prunus persica	54 kDa	0.7	0.02	GO:0006167, GO:0044208	Biological process
Glucose-1-phosphate adenylyltransferase	O22658_CITLA	Citrullus lanatus	58 kDa	0.39	-0.13	GO:0009058, GO:0005978, GO:0019252	Biological process
Putative uncharacterized protein	A9NWJ6_PICSI	Picea sitchensis	41 kDa	0.18	-0.34	GO:0006086, GO:0055114	Biological process
2,3-bisphosphoglycerate-independent phosphoglycerate mutase	B7FLD9_MEDTR	Medicago truncatula	61 kDa	0.51	-0.09	GO:0006007, GO:0008152	Biological process
Monodehydroascorbate reductase	MDAR_PEA	Pisum sativu	47 kDa	0.25	0.22	GO:0055114	Biological process
Putative uncharacterized protein	A5B126_VITVI	Vitis vinifera	15 kDa	0.78	0	GO:0006412	Biological process
40S ribosomal protein S15a-1	R15A1_ARATH	Arabidopsis thaliana	15 kDa	0.053	-0.8	GO:0006412	Biological process
NADH dehydrogenase subunit 9	E6ZE24_BETVM	Beta vulgaris subsp. maritima	23 kDa	0.46	-0.1	GO:0055114	Biological process
ATPase subunit 4	D5I3E4_CUCPE	Cucurbita pepo	22 kDa	0.26	-0.26	GO:0015986	Biological process
Putative uncharacterized protein	A2YP57_ORYSI	Oryza sativa subsp. indica	15 kDa	0.67	-0.11	NA	Biological process
Histone H4 variant TH011	H41_WHEAT	Triticum aestivum	11 kDa	0.67	-0.1	GO:0006334, GO:0009414	Biological process
Chaperone protein ClpC1, chloroplastic	CLPC1_ORYSJ	Oryza sativa subsp. japonica	102 kDa	0.11	0.64	GO:0009658, GO:0034214, GO:0045037, GO:0019538, GO:0006508	Biological process
Dihydrolipoamide acetyltransferase component of pyruvate dehydrogenase	E5GB89_CUCME	Cucumis melo subsp. melo	58 kDa	0.7	0.03	GO:0008152, GO:0006090	Biological process
Uncharacterized protein	M5X2C2_PRUPE	Prunus persica	67 kDa	0.022	-0.27	GO:0055114	Biological process
Uncharacterized protein	K4DFR1_SOLLC	Solanum lycopersicum	69 kDa	0.4	-0.12	GO:0015991, GO:0046034, GO:0015992	Biological process
V-type proton ATPase catalytic subunit A	VATA_BRANA	Brassica napus	69 kDa	0.034	-0.27	GO:0015991, GO:0046034, GO:0006811, GO:0015992	Biological process
Uncharacterized protein	M0ZZ08_SOLTU	Solanum tuberosum	39 kDa	0.26	-0.21	GO:0006086, GO:0055114	Biological process
Putative uncharacterized protein	A5B5R1_VITVI	Vitis vinifera	33 kDa	0.89	-0.03	NA	Biological process
60S acidic ribosomal protein P0	RLA0_SOYBN	Glycine max	34 kDa	0.0047	-0.37	NA	Biological process
Glucose-6-phosphate isomerase	A9S7W2_PHYPA	Physcomitrella patens subsp. patens	61 kDa	0.16	0.29	GO:0006096, GO:0009911, GO:0005982	Biological process
Putative 97 kDa heat shock protein	L8BSJ3_MUSBA	Musa balbisiana	94 kDa	0.25	0.81	NA	Biological process
Proteasome subunit alpha type	B9T3X8_RICCO	Ricinus communis	26 kDa	0.26	-0.85	GO:0043161, GO:0006508, GO:0051603	Biological process
Putative uncharacterized protein	D7TKK5_VITVI	Vitis vinifera	44 kDa	0.7	0.08	NA	Biological process
GTP-binding protein	Q9M7P3_CAPAN	Capsicum annuum	44 kDa	0.44	-0.6	NA	Biological process
Aspartate aminotransferase, chloroplastic	AAT5_ARATH	Arabidopsis thaliana	50 kDa	0.31	-0.14	GO:0006103, GO:0006531, GO:0009058, GO:0006536, GO:0046686, GO:0009409	Biological process
Putative uncharacterized protein	B8AJ67_ORYSI	Oryza sativa subsp. indica	61 kDa	0.25	0.87	GO:0042742, GO:0006397	Biological process
Glucose-1-phosphate adenylyltransferase	B6RQ84_GOSHI	Gossypium hirsutum	57 kDa	0.76	-0.03	GO:0009058, GO:0005978, GO:0008152, GO:0019252	Biological process
Putative uncharacterized protein Sb04g010020	C5XZM3_SORBI	Sorghum bicolor	133 kDa	0.4	0.09	NA	Biological process
Triosephosphate isomerase	A9PH17_POPTR	Populus trichocarpa	34 kDa	0.44	0.27	GO:0009658, GO:0006094, GO:0046166, GO:0019563, GO:0006096, GO:0032504, GO:0080022, GO:0019253, GO:0006642	Biological process
Uncharacterized protein	M5VZS0_PRUPE	Prunus persica	27 kDa	0.94	0.1	GO:0044262, GO:0006094, GO:0006098, GO:0046686, GO:0009735, GO:0009651, GO:0010043	Biological process
Predicted protein	B9HBV6_POPTR	Populus trichocarpa	29 kDa	0.053	-0.42	GO:0055114	Biological process
Methylenetetrahydrofolate reductase	B9HG95_POPTR	Populus trichocarpa	68 kDa	0.67	-0.15	GO:0006555, GO:0006730, GO:0055114, GO:0035999	Biological process
Putative uncharacterized protein	A5C8L8_VITVI	Vitis vinifera	98 kDa	0.7	-0.04	GO:0055114	Biological process
Chloroplast monodehydroascorbate reductase	C3VPH7_AVIMR	Avicennia marina	50 kDa	0.053	-0.25	GO:0055114	Biological process
T-complex protein 1 subunit alpha	I1K467_SOYBN	Glycine max	59 kDa	0.062	-0.21	GO:0061077, GO:0006458	Biological process
V-type proton ATPase subunit B 1	VATB1_GOSHI	Gossypium hirsutum	54 kDa	0.58	0.06	GO:0015991, GO:0046034, GO:0006811, GO:0015992	Biological process
Eukaryotic translation initiation factor 5A-3	IF5A3_SOLLC	Solanum lycopersicum	17 kDa	0.053	-0.43	GO:0045901, GO:0045905, GO:0006412, GO:0006452, GO:0006413	Biological process
Endoplasmin homolog	ENPL_HORVU	Hordeum vulgare	93 kDa	0.0018	-0.29	GO:0006457, GO:0006950	Biological process
Uncharacterized protein	I1LZ93_SOYBN	Glycine max	40 kDa	0.7	-0.75	GO:0055114, GO:0006099	Biological process
3-isopropylmalate dehydrogenase, chloroplastic	LEU3_SOLTU	Solanum tuberosum	40 kDa	0.67	-0.07	GO:0009082, GO:0009098, GO:0055114, GO:0006099	Biological process
Acetyl CoA carboxylase (Fragment)	A3RL33_CAMSI	Camellia sinensis	158 kDa	0.086	-0.22	GO:0006633, GO:0006629, GO:2001295	Biological process
Uncharacterized protein	A2ZXM9_ORYSJ	Oryza sativa subsp. japonica	58 kDa	0.25	-0.5	GO:0006002, GO:0006096, GO:0061615, GO:0008152, GO:0016310, GO:0006508	Biological process
Uncharacterized protein	K4C4W6_SOLLC	Solanum lycopersicum	50 kDa	1	-0.01	GO:0007010, GO:0007017	Biological process
Glutamine synthetase cytosolic isozyme	GLNA1_LOTJA	Lotus japonicus	39 kDa	0.12	0.52	GO:0006542, GO:0006807, GO:0009399, GO:0046686, GO:0090378	Biological process
40S ribosomal protein S9-1	B3H7J6_ARATH	Arabidopsis thaliana	19 kDa	0.25	-0.49	GO:0006412	Biological process
Superoxide dismutase [Cu-Zn]	A1ED47_GOSAR	Gossypium arboreum	22 kDa	0.7	0.29	GO:0055114, GO:0019430	Biological process
Probable fructose-bisphosphate aldolase 2, chloroplastic	ALFC2_ARATH	Arabidopsis thaliana	43 kDa	0.16	-0.17	NA	Biological process
Predicted protein	B9IIQ4_POPTR	Populus trichocarpa	29 kDa	0.7	-0.07	GO:0055114	Biological process
Probable methionine--tRNA ligase	SYM_ORYSJ	Oryza sativa subsp. japonica	89 kDa	0.48	-0.4	GO:0006431, GO:0006412, GO:0006418	Biological process
Granule-bound starch synthase	G1JSF0_CUCMO	Cucurbita moschata	68 kDa	0.44	0.17	GO:0019252	Biological process
Gamma-glutamylcysteine synthetase	K9JCZ2_CUCSA	Cucumis sativus	59 kDa	0.32	-0.26	GO:0042398, GO:0052544, GO:0009816, GO:0050832, GO:0002213, GO:0009908, GO:0019761, GO:0006750, GO:0009700, GO:0046686, GO:0009408, GO:0009753, GO:0010193	Biological process
Putative uncharacterized protein (NADH dehydrogenase, putative )	A5C820_VITVI	Vitis vinifera	69 kDa	0.57	-0.14	GO:0055114	Biological process
40S ribosomal protein S8	A5AUZ0_VITVI	Vitis vinifera	25 kDa	1	0.02	GO:0000462, GO:0006412	Biological process
L-ascorbate oxidase	ASO_CUCMA	Cucurbita maxima	65 kDa	0.066	0.29	GO:0055114	Biological process
Uncharacterized protein	M5XQR4_PRUPE	Prunus persica	112 kDa	0.67	-0.12	GO:0050790, GO:0042176	Biological process
Adenylosuccinate synthetase, chloroplastic	I1N933_SOYBN	Glycine max	53 kDa	0.57	-0.06	GO:0006167, GO:0044208	Biological process
Aspartate aminotransferase, cytoplasmic	AATC_DAUCA	Daucus carota	44 kDa	0.26	-0.64	GO:0006103, GO:0006531, GO:0009058, GO:0006536, GO:0010150	Biological process
Citrate synthase, glyoxysomal	CYSZ_CUCMA	Cucurbita maxima	57 kDa	0.0093	-0.23	GO:0006097, GO:0006099	Biological process
Predicted protein (Fragment) (Succinate dehydrogenase )	B9HEW3_POPTR	Populus trichocarpa	70 kDa	0.18	-0.29	GO:0006121, GO:0009061, GO:0022900, GO:0055114, GO:0006099	Biological process
Chloroplast biotin carboxylase	A5HJL1_GOSHI	Gossypium hirsutum	59 kDa	0.12	0.08	NA	Biological process
Uncharacterized protein	C6TKV3_SOYBN	Glycine max	46 kDa	0.7	-0.09	GO:0055114	Biological process
3-phosphoshikimate 1-carboxyvinyltransferase	Q946U9_9LAMI	Dicliptera chinensis	55 kDa	0.25	-0.13	GO:0009073, GO:0008652, GO:0009423	Biological process
Pyruvate kinase	D7MSA3_ARALL	Arabidopsis lyrata subsp. lyrata	64 kDa	0.89	-0.02	GO:0006633, GO:0006096, GO:0006629, GO:0016310, GO:0046686, GO:0048316, GO:0010431	Biological process
At5g47540	B3LFB8_ARATH	Arabidopsis thaliana	39 kDa	0.7	0.01	NA	Biological process
40S ribosomal protein S13-1	RS131_ARATH	Arabidopsis thaliana	17 kDa	0.16	-0.25	GO:0006412	Biological process
Protein argonaute 4A	AGO4A_ORYSJ	Oryza sativa subsp. japonica	101 kDa	0.29	-0.15	GO:0031047	Biological process
Putative uncharacterized protein	A9P8E9_POPTR	Populus trichocarpa	16 kDa	0.44	0.17	GO:0000462, GO:0000028, GO:0006412	Biological process
40S ribosomal protein S14	RS142_MAIZE	Zea mays	16 kDa	0.073	-0.24	GO:0006412	Biological process
Guanine nucleotide-binding family protein	D7L7Z8_ARALL	Arabidopsis lyrata subsp. lyrata	36 kDa	0.25	-0.15	GO:0071215, GO:0009967, GO:0048364, GO:0009845, GO:0048367	Biological process
Uncharacterized protein (60S ribosomal protein L7 )	M5XTN9_PRUPE	Prunus persica	28 kDa	0.14	-0.18	GO:0002181, GO:0000462	Biological process
4-hydroxy-3-methylbut-2-en-1-yl diphosphate synthase	K7NBL1_SIRGR	Siraitia grosvenorii	82 kDa	0.7	-0.13	GO:0008299, GO:0055114, GO:0016114	Biological process
Pyruvate kinase	B7FLG2_MEDTR	Medicago truncatula	54 kDa	0.7	0.05	GO:0006096, GO:0016310	Biological process
Putative uncharacterized protein	F6GWF3_VITVI	Vitis vinifera	52 kDa	0.7	0.18	GO:0006545, GO:0006730, GO:0035999	Biological process
Cysteine protease inhibitor (Fragment)	G0ZS05_CUCMA	Cucurbita maxima	11 kDa	0.034	0.44	GO:0010951, GO:0010466, GO:0006508	Biological process
Phenylalanine ammonia-lyase 2	PAL2_LITER	Lithospermum erythrorhizon	77 kDa	0.00046	1.46	GO:0009800, GO:0006559	Biological process
Adenylosuccinate synthetase 2, chloroplastic	PURA2_RICCO	Ricinus communis	53 kDa	0.67	-0.01	GO:0044208	Biological process
Fumarate hydratase 1, mitochondrial	FUM1_ARATH	Arabidopsis thaliana	53 kDa	0.087	-0.35	GO:0006106, GO:0006108, GO:0048868, GO:0006979, GO:0009651, GO:0006099	Biological process
Nitrate reductase [NADH]	NIA_CUCMA	Cucurbita maxima	103 kDa	0.11	-0.22	GO:0042128, GO:0006809, GO:0055114	Biological process
Putative uncharacterized protein	C6T531_SOYBN	Glycine max	21 kDa	0.57	-0.04	GO:0006412	Biological process
Ubiquinol oxidase	D4P4J8_CITLA	Citrullus lanatus	40 kDa	0.066	-0.44	GO:0055114	Biological process
Putative uncharacterized protein	A9NK66_PICSI	Picea sitchensis	5 kDa	0.44	0.42	NA	Biological process
Ras-related protein RABA1b	RAA1B_ARATH	Arabidopsis thaliana	24 kDa	0.32	-0.17	GO:0042538, GO:0006886, GO:0015031, GO:0060627	Biological process
Uncharacterized protein	I1N1M0_SOYBN	Glycine max	58 kDa	0.7	-0.07	GO:0006002, GO:0006096, GO:0061615, GO:0008152, GO:0016310	Biological process
6-phosphofructokinase 5, chloroplastic	K6PF5_ARATH	Arabidopsis thaliana	59 kDa	0.78	-0.03	NA	Biological process
Dihydrolipoyl dehydrogenase, mitochondrial	DLDH_PEA	Pisum sativum	53 kDa	0.012	-0.41	GO:0045454, GO:0055114	Biological process
Uncharacterized protein	R0IC76_9BRAS	Capsella rubella	61 kDa	0.2	-0.19	GO:0006007, GO:0008152	Biological process
Putative uncharacterized protein Sb03g029720	C5XF87_SORBI	Sorghum bicolor	63 kDa	0.24	-0.13	GO:0009082, GO:0008652, GO:0009097, GO:0055114, GO:0009099	Biological process
Csf-1 protein (Fragment)	Q9SXL9_CUCSA	Cucumis sativus	16 kDa	0.7	0.78	GO:0006412	Biological process
Phosphoglycerate kinase (Fragment)	G8EW39_9POAL	Kengyilia alatavica	31 kDa	0.7	-0.04	GO:0006096, GO:0016310	Biological process
Putative uncharacterized protein	F6GXU4_VITVI	Vitis vinifera	128 kDa	0.053	0.55	GO:0006464, GO:0006974, GO:0016567, GO:0006511	Biological process
Ubiquitin-activating enzyme E1 3	UBE13_WHEAT	Triticum aestivum	116 kDa	0.4	-0.08	GO:0016567	Biological process
Proteasome subunit alpha type	A5AXI5_VITVI	Vitis vinifera	27 kDa	0.12	0.6	GO:0006508, GO:0051603	Biological process
Probable 26S proteasome non-ATPase regulatory subunit 3	PSMD3_TOBAC	Nicotiana tabacum	56 kDa	0.19	-0.22	GO:0050790, GO:0042176	Biological process
Predicted protein	B9HRZ1_POPTR	Populus trichocarpa	113 kDa	0.1	-0.23	GO:0006508	Biological process
Putative uncharacterized protein	A2XVU7_ORYSI	Oryza sativa subsp. indica	55 kDa	0.26	0.24	NA	Biological process
Elongation factor Tu, chloroplastic	EFTU1_SOYBN	Glycine max	52 kDa	0.011	0.2	GO:0006412, GO:0006414	Biological process
Putative glyoxysomal fatty acid beta-oxidation multifunctional protein	B1Q485_CAPCH	Capsicum chinense	79 kDa	0.26	-0.27	GO:0006631, GO:0008152, GO:0055114	Biological process
Superoxide dismutase (Fragment)	Q6QGY4_CITLA	Citrullus lanatus	16 kDa	0.16	0.2	GO:0055114, GO:0019430	Biological process
40S ribosomal protein S16	RS16_GOSHI	Gossypium hirsutum	16 kDa	0.26	-0.2	GO:0006412	Biological process
Putative uncharacterized protein	B7FN60_MEDTR	Medicago truncatula	19 kDa	0.25	0.47	GO:1900871, GO:0009658	Biological process
Glycine--tRNA ligase 1, mitochondrial	SYGM1_ARATH	Arabidopsis thaliana	82 kDa	0.17	0.1	GO:0015966, GO:0006426, GO:0070150, GO:0046686, GO:0006412, GO:0006418	Biological process
Predicted protein	A9PBR7_POPTR	Populus trichocarpa	21 kDa	0.7	0	GO:0006412	Biological process
Predicted protein	B9IBF2_POPTR	Populus trichocarpa	45 kDa	0.6	-0.15	GO:0008152, GO:0046686, GO:0006099	Biological process
Peptidyl-prolyl cis-trans isomerase	CYPX_USEUD	Unspecified eudicot	18 kDa	0.2	0.33	GO:0006457, GO:0000413	Biological process
Uncharacterized protein	M0ZY64_SOLTU	Solanum tuberosum	38 kDa	0.7	0.05	GO:0006595	Biological process
Spermidine synthase 1	SPD1_HYONI	Hyoscyamus niger	35 kDa	0.25	-0.13	GO:0008295	Biological process
Adenylate kinase A	KAD1_ORYSJ	Oryza sativa subsp. japonica	26 kDa	0.44	-0.18	GO:0006139, GO:0046939, GO:0016310, GO:2000505	Biological process
Glutathione peroxidase	B9RCA6_RICCO	Ricinus communis	19 kDa	0.67	0.47	GO:0098869, GO:0055114, GO:0006979	Biological process
TCP domain class transcription factor	D9ZJD1_MALDO	Malus domestica	57 kDa	0.4	0.05	GO:0006457	Biological process
Proteasome subunit alpha type	A5C3G9_VITVI	Vitis vinifera	31 kDa	0.57	-0.02	GO:0006508, GO:0051603, GO:0006511	Biological process
Proteasome subunit alpha type-4	PSA4_PETHY	Petunia hybrida	27 kDa	0.32	0.09	GO:0006508, GO:0051603, GO:0006511	Biological process
Malate dehydrogenase, glyoxysomal	MDHG_CITLA	Citrullus lanatus	38 kDa	0.76	-0.02	GO:0006097, GO:0006108, GO:0055114, GO:0006099	Biological process
Coatomer subunit beta	I1KG56_SOYBN	Glycine max	106 kDa	0.25	0.46	GO:0006888, GO:0006886, GO:0006891, GO:0015031, GO:0006890, GO:0016192	Biological process
Fumarylacetoacetate hydrolase, putative	B9S3J5_RICCO	Ricinus communis	46 kDa	0.44	0.1	GO:0009072	Biological process
Putative uncharacterized protein	A5AEB0_VITVI	Vitis vinifera	47 kDa	0.76	0.02	GO:0043248, GO:0006511	Biological process
Uncharacterized protein	I1L117_SOYBN	Glycine max	87 kDa	0.09	-0.46	GO:0042787, GO:0006511	Biological process
Acyl-coenzyme A oxidase, peroxisomal	ACOX2_CUCMA	Cucurbita maxima	77 kDa	0.32	-0.41	GO:0006635, GO:0006631, GO:0006629, GO:0008152, GO:0055114	Biological process
Predicted protein	B9HU92_POPTR	Populus trichocarpa	43 kDa	0.89	0.11	GO:0006086, GO:0055114	Biological process
40S ribosomal protein S6	A2XHI9_ORYSI	Oryza sativa subsp. indica	29 kDa	1	0.05	GO:0006412	Biological process
Probable phospholipid hydroperoxide glutathione peroxidase	GPX4_GOSHI	Gossypium hirsutum	19 kDa	0.39	0.1	GO:0098869, GO:0055114, GO:0006979	Biological process
Dimeric phloem specific lectin PP2	Q42383_CUCMA	Cucurbita maxima	24 kDa	0.011	0.36	NA	Biological process
Uncharacterized protein	M5XHS7_PRUPE	Prunus persica	15 kDa	0.7	0.2	GO:0006412	Biological process
Uncharacterized protein	M0SJM4_MUSAM	Musa acuminata subsp. malaccensis	57 kDa	0.4	0.23	GO:0009082, GO:0055114	Biological process
Calreticulin-2	CALR2_ARATH	Arabidopsis thaliana	48 kDa	0.44	0.17	GO:0006457, GO:0006979, GO:0009651	Biological process
Uncharacterized protein	B4FZU5_MAIZE	Zea mays	24 kDa	0.7	0.05	GO:0008152	Biological process
60S ribosomal protein L8-1	RL81_ARATH	Arabidopsis thaliana	28 kDa	0.94	-0.02	GO:0002181, GO:0006412	Biological process
Putative uncharacterized protein	A5BL32_VITVI	Vitis vinifera	40 kDa	0.25	-0.16	GO:0006069, GO:0055114	Biological process
Alcohol dehydrogenase class-3	ADHX_PEA	Pisum sativum	40 kDa	0.16	-0.19	GO:0006069, GO:0055114	Biological process
NADH-ubiquinone oxidoreductase flavoprotein	E5GBX7_CUCME	Cucumis melo subsp. melo	53 kDa	0.21	-0.1	GO:0055114	Biological process
Glutamate-1-semialdehyde 21-aminomutase	E5GCQ7_CUCME	Cucumis melo subsp. melo	50 kDa	0.44	0.15	GO:0033014	Biological process
Putative uncharacterized protein	A5C9G0_VITVI	Vitis vinifera	18 kDa	0.01	-0.7	GO:0000027, GO:0006412	Biological process
Importin subunit alpha	K4AWF0_SOLLC	Solanum lycopersicum	59 kDa	0.056	0.22	GO:0006607, GO:0015031	Biological process
ADP,ATP carrier protein 1, chloroplastic	TLC1_ARATH	Arabidopsis thaliana	68 kDa	0.048	-0.7	GO:0015866, GO:0015867	Biological process
V-type proton ATPase subunit D	VATD_ARATH	Arabidopsis thaliana	29 kDa	0.89	0.03	GO:0006811, GO:0015992, GO:0055085	Biological process
Uncharacterized protein	C6TJL2_SOYBN	Glycine max	44 kDa	0.32	-0.05	GO:0043248, GO:0006511	Biological process
Late-embryogenesis abundant protein 2	C6T750_SOYBN	Glycine max	34 kDa	0.79	0.02	GO:0046686, GO:0009735, GO:0009269	Biological process
Putative uncharacterized protein	F6I5Y5_VITVI	Vitis vinifera	69 kDa	0.12	-0.62	GO:0008652, GO:0009793, GO:0006564, GO:0009561, GO:0055114, GO:0009555	Biological process
Xylose isomerase	D7MNC2_ARALL	Arabidopsis lyrata subsp. lyrata	54 kDa	0.053	-0.41	GO:0005975, GO:0042732, GO:0009561, GO:0006098	Biological process
NADH dehydrogenase subunit 7	D5I3D0_CITLA	Citrullus lanatus	45 kDa	0.055	-0.2	GO:0055114, GO:0009555	Biological process
Succinate dehydrogenase	E5GCD7_CUCME	Cucumis melo subsp. melo	31 kDa	0.48	0.05	GO:0055114, GO:0006099	Biological process
V-type proton ATPase subunit E	VATE_MESCR	Mesembryanthemum crystallinum	26 kDa	0.48	0.07	GO:0015991, GO:0006811, GO:0015992	Biological process
Glycolate oxidase	Q39640_9ROSI	Cucurbita cv. Kurokawa Amakuri	40 kDa	0.67	-0.01	GO:0055114, GO:0009854, GO:0009853	Biological process
Predicted protein	D7LXS6_ARALL	Arabidopsis lyrata subsp. lyrata	59 kDa	0.78	0.66	GO:0061077, GO:0006458, GO:0051050	Biological process
Uncharacterized protein	I1JIN5_SOYBN	Glycine max	71 kDa	0.12	0.39	GO:0005975, GO:0009251	Biological process
Thylakoid-bound ascorbate peroxidase (Precursor)	O04873_9ROSI	Cucurbita cv. Kurokawa Amakuri	46 kDa	0.92	0.02	GO:0098869, GO:0055114, GO:0006979	Biological process
Probable pre-mRNA-splicing factor ATP-dependent RNA helicase	DHX15_ARATH	Arabidopsis thaliana	83 kDa	0.1	-0.29	NA	Biological process
Putative uncharacterized protein	D7SY46_VITVI	Vitis vinifera	60 kDa	0.7	-0.1	GO:0045454, GO:0055114	Biological process
Diphosphomevalonate decarboxylase	K7NBV8_SIRGR	Siraitia grosvenorii	46 kDa	0.016	-0.26	GO:0019287, GO:0008299, GO:0006694, GO:0016126	Biological process
Uncharacterized protein	K7KRS4_SOYBN	Glycine max	52 kDa	0.16	-0.18	GO:0006002, GO:0006096, GO:0061615, GO:0008152, GO:0016310	Biological process
Putative uncharacterized protein	A2Y6U4_ORYSI	Oryza sativa subsp. indica	54 kDa	0.57	-0.06	GO:0005975, GO:0046835, GO:0001678, GO:0006096	Biological process
Arginine biosynthesis bifunctional protein ArgJ, chloroplastic	ARGJ_CITLA	Citrullus lanatus	48 kDa	0.48	-0.14	GO:0006526, GO:0008652, GO:0008152	Biological process
Proteasome subunit beta type	C6TLJ9_SOYBN	Glycine max	29 kDa	0.4	0.09	GO:0051603	Biological process
Glucose-6-phosphate 1-dehydrogenase 2, chloroplastic	G6PD2_ARATH	Arabidopsis thaliana	67 kDa	0.48	-0.12	GO:0005975, GO:0006006, GO:0055114, GO:0009051	Biological process
Eukaryotic translation initiation factor 6	D7LV66_ARALL	Arabidopsis lyrata subsp. lyrata	27 kDa	0.26	0.12	GO:0071215, GO:0009793, GO:0042256, GO:0006412, GO:0006413	Biological process
Inosine-5'-monophosphate dehydrogenase	A7XZM6_CAMSI	Camellia sinensis	53 kDa	0.67	0.01	GO:0006177, GO:0055114	Biological process
Ferredoxin--nitrite reductase	B6SY01_MAIZE	Zea mays	66 kDa	0.053	-0.74	GO:0055114	Biological process
Malic enzyme	K4CLL3_SOLLC	Solanum lycopersicum	65 kDa	0.7	-0.38	GO:0006108, GO:0055114, GO:0006090	Biological process
NADP-dependent malic enzyme	MAOX_POPTR	Populus trichocarpa	65 kDa	0.44	-0.13	GO:0006108, GO:0055114, GO:0051260	Biological process
Predicted protein	B9HX41_POPTR	Populus trichocarpa	21 kDa	0.57	0.07	GO:0007017, GO:0006457, GO:0007021	Biological process
Superoxide dismutase [Cu-Zn]	A8CF89_POPAL	Populus alba	22 kDa	0.0047	0.84	GO:0055114, GO:0019430	Biological process
Cytochrome b-c1 complex subunit Rieske, mitochondrial	UCRI_SOLTU	Solanum tuberosum	29 kDa	0.0047	-0.45	GO:1902600, GO:0055114	Biological process
Putative uncharacterized protein	A5AS18_VITVI	Vitis vinifera	22 kDa	0.48	0.16	GO:0055114	Biological process
Neutral alpha-glucosidase ab, putative	B9S1M1_RICCO	Ricinus communis	111 kDa	0.12	0.28	GO:0005975, GO:0000023	Biological process
60S ribosomal protein L13	A5CB91_VITVI	Vitis vinifera	24 kDa	0.31	-0.29	GO:0006412	Biological process
NADH dehydrogenase [ubiquinone] iron-sulfur protein 7, mitochondrial	NDUS7_ARATH	Arabidopsis thaliana	24 kDa	0.89	0.01	GO:0055114	Biological process
Putative uncharacterized protein	B7FMA7_MEDTR	Medicago truncatula	22 kDa	0.25	-0.31	GO:0006886, GO:0015031, GO:0016192	Biological process
GTP-binding protein SAR1	SAR1_TOBAC	Nicotiana tabacum	23 kDa	0.7	-0.03	GO:0006886, GO:0015031, GO:0016192	Biological process
Chloroplast transketolase	G8EX76_CUCSA	Cucumis sativus	81 kDa	0.053	0.86	GO:0008152	Biological process
Putative uncharacterized protein	B7FJA2_MEDTR	Medicago truncatula	26 kDa	0.89	0.17	NA	Biological process
Phospholipase D alpha 1	PLDA1_VIGUN	Vigna unguiculata	92 kDa	0.36	0.11	GO:0016042, GO:0046470	Biological process
Beta-adaptin-like protein B	APBLB_ARATH	Arabidopsis thaliana	99 kDa	0.056	-0.27	GO:0006886, GO:0015031, GO:0016192	Biological process
Ribulose bisphosphate carboxylase large chain (Fragment)	RBL_ERICA	Eriodictyon californicum	52 kDa	0.48	0.14	GO:0015977, GO:0055114, GO:0009853, GO:0015979, GO:0019253	Biological process
Putative uncharacterized protein	A5BGG6_VITVI	Vitis vinifera	32 kDa	0.034	0.95	GO:0000045, GO:0007030, GO:0061025, GO:0031468, GO:0043161, GO:0050790	Biological process
Peptidyl-prolyl cis-trans isomerase FKBP12	FKB12_VICFA	Vicia faba	12 kDa	0.066	-0.33	GO:0000413	Biological process
Uncharacterized protein	I1KPV1_SOYBN	Glycine max	55 kDa	0.056	-0.35	GO:0006508	Biological process
Cysteine synthase	CYSK_CITLA	Citrullus lanatus	34 kDa	0.57	0.16	GO:0008652, GO:0006535	Biological process
Uncharacterized protein	K7MK66_SOYBN	Glycine max	107 kDa	0.48	0.08	GO:0051017, GO:0007010	Biological process
UTP--glucose-1-phosphate uridylyltransferase	UGPA_SOLTU	Solanum tuberosum	52 kDa	0.78	0.05	GO:0006011	Biological process
Probable aldo-keto reductase 2	AKR2_ORYSI	Oryza sativa subsp. indica	38 kDa	0.048	0.23	GO:0055114	Biological process
Serine hydroxymethyltransferase, mitochondrial	GLYM_PEA	Pisum sativum	57 kDa	0.01	-0.37	GO:0006545, GO:0032259, GO:0006730, GO:0035999	Biological process
Uncharacterized protein	M5XQ24_PRUPE	Prunus persica	48 kDa	0.32	0.09	NA	Biological process
DEAD-box ATP-dependent RNA helicase 15	RH15_ARATH	Arabidopsis thaliana	48 kDa	0.84	-0.02	GO:0006974, GO:0006406, GO:0006397, GO:0000398, GO:0051028, GO:0010468, GO:0046686, GO:0010501	Biological process
Pyrroline-5-carboxylate synthetase	G3M0R4_CUCME	Cucumis melo	78 kDa	0.74	0.1	GO:0008652, GO:0055129, GO:0055114, GO:0016310, GO:0006561	Biological process
Ras-related protein Rab7	RAB7_SOYBN	Glycine max	23 kDa	0.44	-0.22	GO:0015031	Biological process
Predicted protein (Ferredoxin-dependent glutamate synthase)	B9IHR5_POPTR	Populus trichocarpa	163 kDa	0.053	0.22	GO:0019676, GO:0006537, GO:0008152, GO:0006807, GO:0055114	Biological process
Acetyl-CoA C-acyltransferase (3-ketoacyl-coa thiolase b) (Fragment)	Q42918_MANIN	Mangifera indica	45 kDa	0.7	-0.73	GO:0008152	Biological process
Glutathione reductase	I6P8E9_9ROSI	Dimocarpus longan	60 kDa	0.011	0.77	GO:0045454, GO:0098869, GO:0006749, GO:0055114	Biological process
Chloroplast NADP-dependent glyceraldehyde 3-phosphate dehydrogenase B subunit (Fragment)	Q9FV16_CUCPE	Cucurbita pepo	18 kDa	0.36	-0.15	GO:0055114	Biological process
Putative uncharacterized protein	A5ASG9_VITVI	Vitis vinifera	58 kDa	0.32	0.41	GO:0009911	Biological process
Uncharacterized protein	I1JMZ4_SOYBN	Glycine max	22 kDa	0.36	0.19	NA	Biological process
Alcohol dehydrogenase class-3	ADHX_ARATH	Arabidopsis thaliana	41 kDa	0.4	-0.24	GO:0006069, GO:0055114	Biological process
T-complex protein 1 subunit epsilon	TCPE_ARATH	Arabidopsis thaliana	59 kDa	0.52	0.26	GO:0061077, GO:0006458	Biological process
40S ribosomal protein S11	RS11_MAIZE	Zea mays	18 kDa	0.048	-0.85	GO:0006412	Biological process
Phospho-2-dehydro-3-deoxyheptonate aldolase 1, chloroplast, putative	B9T0A7_RICCO	Ricinus communis	59 kDa	0.78	0.02	GO:0009073, GO:0008652, GO:0009423	Biological process
Uncharacterized protein	I1JGP8_SOYBN	Glycine max	60 kDa	0.16	0.28	GO:0006508	Biological process
Uncharacterized protein	M0RVC5_MUSAM	Musa acuminata subsp. malaccensis	14 kDa	0.44	0.12	GO:0006412	Biological process
Ras-related protein RABA4a	RAA4A_ARATH	Arabidopsis thaliana	25 kDa	0.78	-0.07	GO:0042546, GO:0015031	Biological process
Proteasome subunit beta type-2-B	PSB2B_ARATH	Arabidopsis thaliana	22 kDa	0.89	0.05	GO:0051603	Biological process
Uncharacterized protein	I1JGR4_SOYBN	Glycine max	86 kDa	0.72	0.09	NA	Biological process
60S ribosomal protein L10-1	RL101_ORYSI	Oryza sativa subsp. indica	25 kDa	0.09	-0.42	GO:0006412	Biological process
Ketol-acid reductoisomerase, chloroplastic	ILV5_PEA	Pisum sativum	63 kDa	0.26	-0.34	GO:0009082, GO:0009097, GO:0055114, GO:0009099	Biological process
Uridine kinase	B9GJS2_POPTR	Populus trichocarpa	54 kDa	0.44	-0.07	GO:0044211, GO:0006207, GO:0009116, GO:0016310, GO:0043097, GO:2001006, GO:1901141, GO:2000904, GO:0044206	Biological process
Putative uncharacterized protein	D8RV35_SELML	Selaginella moellendorffii	71 kDa	1	-0.31	GO:0006457	Biological process
Alpha-1,4-glucan-protein synthase [UDP-forming]	UPTG_MAIZE	Zea mays	41 kDa	0.0081	-0.23	GO:0071555, GO:0030244	Biological process
Ketol-acid reductoisomerase, chloroplastic	ILV5_ORYSJ	Oryza sativa subsp. japonica	62 kDa	0.013	-0.41	GO:0009082, GO:0009097, GO:0055114, GO:0009099	Biological process
U5 small nuclear ribonucleoprotein 200 kDa helicase	G7IJ55_MEDTR	Medicago truncatula	252 kDa	0.7	0.66	NA	Biological process
Putative uncharacterized protein	B8LLU9_PICSI	Picea sitchensis	82 kDa	0.12	-0.36	GO:0007059, GO:0006265	Biological process
DEAD-box ATP-dependent RNA helicase 2	RH2_ARATH	Arabidopsis thaliana	46 kDa	0.7	0.09	GO:0006397, GO:0051028, GO:0000956, GO:0000184, GO:0006417, GO:0001666, GO:0010501, GO:0008380	Biological process
Predicted protein	B9H9T9_POPTR	Populus trichocarpa	104 kDa	0.48	0.1	GO:0051017, GO:0007010	Biological process
Predicted protein	B9GSH1_POPTR	Populus trichocarpa	35 kDa	0.4	0.2	GO:0080009, GO:0000381	Biological process
Uncharacterized protein	M4DUK0_BRARP	Brassica rapa subsp. pekinensis	22 kDa	0.67	0.04	GO:0006412	Biological process
GDP-D-mannose-3',5'-epimerase	A0EJL8_MALGL	Malpighia glabra	43 kDa	0.32	-0.16	NA	Biological process
Protein grpE, putative	B9SYX8_RICCO	Ricinus communis	34 kDa	0.23	-0.27	GO:0006457, GO:0050790	Biological process
Phosphoribosylformylglycinamidine cyclo-ligase	A9S752_PHYPA	Physcomitrella patens subsp. patens	35 kDa	0.0072	0.34	GO:0006189	Biological process
Cysteine synthase	A8ISA9_CHLRE	Chlamydomonas reinhardtii	38 kDa	0.25	-0.7	GO:0008652, GO:0019344, GO:0006535	Biological process
Proteasome subunit beta type	B7FH05_MEDTR	Medicago truncatula	23 kDa	1	0	GO:0051603	Biological process
Cysteine synthase	A9PJI4_9ROSI	Populus trichocarpa x Populus deltoides	43 kDa	0.44	0.18	GO:0008652, GO:0019344, GO:0006535	Biological process
Succinyl-CoA ligase [ADP-forming] subunit alpha-1, mitochondrial	SUCA1_SOLLC	Solanum lycopersicum	35 kDa	0.53	0.05	GO:0008152, GO:0006105, GO:0006104, GO:0006099	Biological process
DNA damage-binding protein 1a	DDB1A_ARATH	Arabidopsis thaliana	121 kDa	0.39	-0.23	GO:0006974, GO:0009585, GO:0006289, GO:0043161, GO:0016567, GO:0010017	Biological process
Eukaryotic translation initiation factor 3 subunit D	B9H2U0_POPTR	Populus trichocarpa	63 kDa	0.24	-0.15	GO:0006412, GO:0006413	Biological process
Putative uncharacterized protein	B8LR96_PICSI	Picea sitchensis	68 kDa	0.7	0.17	GO:0000054, GO:0006413, GO:0006415	Biological process
Uncharacterized protein	M5XKS7_PRUPE	Prunus persica	98 kDa	0.011	0.39	GO:0005975, GO:0008152	Biological process
NADP-dependent malic enzyme 4, chloroplastic	MAOP4_ARATH	Arabidopsis thaliana	71 kDa	0.78	-0.14	GO:0006633, GO:0006108, GO:0055114, GO:0051289, GO:0006090	Biological process
Serine-threonine protein kinase, plant-type, putative	B9RI89_RICCO	Ricinus communis	40 kDa	0.57	-0.03	GO:0055114, GO:0016310	Biological process
Predicted protein	B9GI44_POPTR	Populus trichocarpa	86 kDa	0.14	0.2	GO:0010501	Biological process
Glucose-6-phosphate 1-dehydrogenase, cytoplasmic isoform 1	G6PD5_ARATH	Arabidopsis thaliana	59 kDa	0.16	-0.24	GO:0005975, GO:0006006, GO:0055114, GO:0009051, GO:0046686	Biological process
Phenylalanine ammonia-lyase (Fragment)	Q43211_WHEAT	Triticum aestivum	37 kDa	0.053	1.67	GO:0006559	Biological process
Eukaryotic peptide chain release factor subunit 1-1	ERF1X_ARATH	Arabidopsis thaliana	49 kDa	0.94	0.01	GO:0040008, GO:0006412, GO:0006415	Biological process
Peroxisomal (S)-2-hydroxy-acid oxidase GLO5	GLO5_ORYSI	Oryza sativa subsp. indica	40 kDa	0.7	0.24	GO:0019048, GO:0055114, GO:0009854, GO:0009853, GO:0010109	Biological process
Uncharacterized protein	M5VQX2_PRUPE	Prunus persica	27 kDa	0.26	0.11	GO:0006508, GO:0051603, GO:0006511	Biological process
Proteasome subunit alpha type-7	PSA7_CICAR	Cicer arietinum	27 kDa	0.12	0.2	GO:0006508, GO:0051603, GO:0006511	Biological process
Formate dehydrogenase, mitochondrial	FDH_HORVU	Hordeum vulgare	42 kDa	0.57	-0.34	GO:0008152, GO:0055114	Biological process
Transketolase, chloroplastic	TKTC_SPIOL	Spinacia oleracea	80 kDa	0.89	0.05	GO:0008152, GO:0009051, GO:0019253	Biological process
Coatomer subunit gamma-2	COPG2_ORYSJ	Oryza sativa subsp. japonica	99 kDa	0.78	0.08	GO:0006886, GO:0015031, GO:0016192	Biological process
Uncharacterized protein	K4CMS0_SOLLC	Solanum lycopersicum	120 kDa	0.7	-0.14	GO:0005975, GO:0008152	Biological process
Probable protein phosphatase 2C 10	P2C10_ORYSJ	Oryza sativa subsp. japonica	38 kDa	0.028	0.11	GO:0006470	Biological process
Putative pyruvate dehydrogenase E3 subunit	B5LAW5_CAPAN	Capsicum annuum	61 kDa	1	0.03	GO:0045454, GO:0055114	Biological process
Leucine aminopeptidase, chloroplastic	AMPL_SOLTU	Solanum tuberosum	60 kDa	0.94	0.04	GO:0006508	Biological process
Predicted protein (Fragment)	B9NDN5_POPTR	Populus trichocarpa	86 kDa	0.72	-0.2	NA	Biological process
Uncharacterized protein	K4CBF0_SOLLC	Solanum lycopersicum	60 kDa	0.7	0.16	GO:0008152, GO:0006090	Biological process
ATP synthase subunit beta	F6GTT2_VITVI	Vitis vinifera	59 kDa	1	-0.19	GO:0016887, GO:0000166, GO:0046933, GO:0016787, GO:0005524	Molecular function
Heat shock protein 70	Q9M4E7_CUCSA	Cucumis sativus	71 kDa	0.038	0.23	GO:0019904, GO:0051082, GO:0016491, GO:0016887, GO:0005524, GO:0000166, GO:0045296, GO:0031625, GO:0032440, GO:0051787, GO:0019899	Molecular function
Alpha-1,4 glucan phosphorylase	B2DG14_CUCMA	Cucurbita maxima	96 kDa	0.39	0.08	GO:0008184, GO:0030170, GO:0016757	Molecular function
Polyubiquitin (Fragment)	UBIQP_ACECL	Acetabularia cliftonii	47 kDa	0.25	0.48	GO:0003735, GO:0005515	Molecular function
Glyceraldehyde-3-phosphate dehydrogenase	G3PC_SINAL	Sinapis alba	37 kDa	0.54	-0.18	GO:0050661, GO:0051287, GO:0004365	Molecular function
ATP synthase subunit alpha	Q8SID6_9ERIC	Palaquium formosanum	43 kDa	0.77	-0.01	GO:0046933, GO:0005524, GO:0000166, GO:0032559	Molecular function
Heat shock protein 90-1	B6EBD7_SOYBN	Glycine max	80 kDa	0.36	0.12	GO:0051082, GO:0000166, GO:0016887, GO:0005524	Molecular function
Uncharacterized protein	I1LXY1_SOYBN	Glycine max	89 kDa	0.54	0.06	GO:0008705, GO:0008270, GO:0003871	Molecular function
Predicted protein	A9P8Q7_POPTR	Populus trichocarpa	29 kDa	0.43	0.29	GO:0051117, GO:0043130, GO:0046982, GO:0019904, GO:0004519	Molecular function
Alkaline alpha galactosidase 3	H6WX41_CUCSA	Cucumis sativus	86 kDa	0.092	-0.35	GO:0047268, GO:0016757, GO:0016787, GO:0052692, GO:0004557	Molecular function
Putative uncharacterized protein (enolase were in cluster)	D7T227_VITVI	Vitis vinifera	48 kDa	0.21	-0.34	GO:0016829, GO:0016787, GO:0000287, GO:0004634	Molecular function
Adenine nucleotide translocator	E5GB77_CUCME	Cucumis melo subsp. melo	42 kDa	0.084	-0.81	GO:0005471	Molecular function
Malate dehydrogenase (Fragment)	A1BQK6_CUCSA	Cucumis sativus	14 kDa	0.7	0.03	GO:0030060, GO:0016615, GO:0003824, GO:0016616, GO:0016491	Molecular function
UDP-glucose pyrophosphorylase	Q19TV8_CUCME	Cucumis melo	52 kDa	0.6	-0.03	GO:0016740, GO:0003983	Molecular function
Aconitate hydratase, cytoplasmic	ACOC_CUCMA	Cucurbita maxima	98 kDa	0.88	-0.03	GO:0003994, GO:0005515, GO:0048027, GO:0005524, GO:0005507, GO:0051539	Molecular function
Fructose-bisphosphate aldolase	K4D3E4_SOLLC	Solanum lycopersicum	38 kDa	0.32	0.2	GO:0016829, GO:0004332	Molecular function
Phosphorylase	B2DG13_CUCMA	Cucurbita maxima	109 kDa	0.0059	0.2	GO:0016757, GO:0008184, GO:0030170	Molecular function
Chaperonin CPN60-2, mitochondrial	CH62_CUCMA	Cucurbita maxima	61 kDa	0.04	-0.88	GO:0051082, GO:0044183, GO:0000166, GO:0005524	Molecular function
Uncharacterized protein	K7MS29_SOYBN	Glycine max	164 kDa	0.078	-0.28	GO:0000166, GO:0003824, GO:0050521, GO:0046872, GO:0009365, GO:0005524	Molecular function
Putative uncharacterized protein	F6HQQ7_VITVI	Vitis vinifera	112 kDa	0.89	-0.24	GO:2001070, GO:0030246, GO:0004134	Molecular function
4-alpha-glucanotransferase, putative	B9SCF0_RICCO	Ricinus communis	104 kDa	0.44	-0.22	GO:0030246, GO:0016757, GO:0004134, GO:2001070	Molecular function
Glucose-6-phosphate isomerase	E0CQ39_VITVI	Vitis vinifera	63 kDa	1	-0.17	GO:0004347	Molecular function
Peptidyl-prolyl cis-trans isomerase	G3CU70_MOMCH	Momordica charantia	18 kDa	1	-0.03	GO:0003755	Molecular function
Hexokinase 1	B6V3C0_CUCME	Cucumis melo	54 kDa	0.89	-0.1	GO:0019158, GO:0005524, GO:0016301, GO:0000166, GO:0005515, GO:0005536, GO:0004340, GO:0008270, GO:0008865	Molecular function
Galactokinase	B6V3B9_CUCME	Cucumis melo	55 kDa	0.13	-0.28	GO:0016301, GO:0016773, GO:0033858, GO:0005524, GO:0004335, GO:0005534	Molecular function
Putative uncharacterized protein	D8R6D5_SELML	Selaginella moellendorffii	68 kDa	0.44	0.62	GO:0005524, GO:0000166, GO:0051082	Molecular function
Heat shock 70 kDa protein, mitochondrial	HSP7M_PHAVU	Phaseolus vulgaris	73 kDa	0.0042	0.4	GO:0005524, GO:0000166, GO:0051082	Molecular function
2,3-bisphosphoglycerate-independent phosphoglycerate mutase	PMGI_RICCO	Ricinus communis	61 kDa	0.28	-0.19	GO:0004619, GO:0046872, GO:0030145	Molecular function
Malate dehydrogenase	A8MQK3_ARATH	Arabidopsis thaliana	33 kDa	0.82	0.01	GO:0030060, GO:0016491, GO:0005507, GO:0016616	Molecular function
Putative uncharacterized protein	A5AQD0_VITVI	Vitis vinifera	12 kDa	0.12	0.67	GO:0009055, GO:0020037, GO:0046872	Molecular function
Elongation factor EF-2	G7IH33_MEDTR	Medicago truncatula	94 kDa	0.068	-0.2	GO:0000166, GO:0003924, GO:0003746, GO:0005525	Molecular function
Putative uncharacterized protein	A5AEB9_VITVI	Vitis vinifera	45 kDa	0.043	-0.23	GO:0000166, GO:0017025, GO:0005524, GO:0036402	Molecular function
26S protease regulatory subunit 6B homolog	PRS6B_ARATH	Arabidopsis thaliana	46 kDa	0.16	-0.16	GO:0005524, GO:0017025, GO:0000166, GO:0036402	Molecular function
Actin 1	M4WH59_DIOMU	Dionaea muscipula	42 kDa	0.65	0.1	GO:0000166, GO:0005524	Molecular function
UDP-glucose 4-epimerase 5	UGE5_ARATH	Arabidopsis thaliana	39 kDa	0.92	-0.06	GO:0003978, GO:0016854	Molecular function
Putative eukaryotic translation initiation factor 4A (Fragment)	Q5K406_9CARY	Silene viscosa	19 kDa	0.78	-0.1	GO:0003743, GO:0000166, GO:0005524, GO:0004386, GO:0016787	Molecular function
Mitochondrial processing peptidase beta subunit	Q9AXQ2_CUCME	Cucumis melo	59 kDa	0.011	-0.37	GO:0004222, GO:0008270, GO:0046872	Molecular function
Glutathione S-transferase	Q8GT24_CUCMA	Cucurbita maxima	23 kDa	0.016	0.26	GO:0016740	Molecular function
Predicted protein	A9RP29_PHYPA	Physcomitrella patens subsp. patens	24 kDa	0.58	-0.66	GO:0051287, GO:0004013	Molecular function
D-3-phosphoglycerate dehydrogenase, putative	B9RYA3_RICCO	Ricinus communis	63 kDa	0.39	-0.95	GO:0005524, GO:0004617	Molecular function
Probable sucrose-phosphate synthase 2	SPSA2_CRAPL	Craterostigma plantagineum	121 kDa	0.87	0.04	GO:0016757, GO:0046524, GO:0016157	Molecular function
Annexin	E5GCK3_CUCME	Cucumis melo subsp. melo	72 kDa	0.027	-0.26	GO:0005544, GO:0005509	Molecular function
Histone H2B	A2IBL2_NICBE	Nicotiana benthamiana	16 kDa	0.25	0.2	GO:0046982, GO:0003677	Molecular function
Predicted protein	B9MTE3_POPTR	Populus trichocarpa	90 kDa	0.8	-0.02	GO:0005515, GO:0016787, GO:0005524, GO:0000166	Molecular function
Mitochondrial phosphate carrier protein, putative	B9RH00_RICCO	Ricinus communis	39 kDa	0.053	-0.91	GO:0005315, GO:0015114	Molecular function
Putative uncharacterized protein	D7TFJ4_VITVI	Vitis vinifera	48 kDa	0.1	0.36	GO:0004801, GO:0003824	Molecular function
Pyruvate kinase	D7LUD2_ARALL	Arabidopsis lyrata subsp. lyrata	57 kDa	0.024	-0.47	GO:0004743, GO:0016301, GO:0030955, GO:0000287	Molecular function
Thioredoxin	Q8H9E2_CUCMA	Cucurbita maxima	13 kDa	0.09	0.56	GO:0015035	Molecular function
Uncharacterized protein	M5XRY7_PRUPE	Prunus persica	52 kDa	0.016	-0.36	GO:0016787, GO:0016161	Molecular function
Beta-amylase	F6HS29_VITVI	Vitis vinifera	52 kDa	0.78	-0.04	GO:0016161	Molecular function
Predicted protein	B9HCM7_POPTR	Populus trichocarpa	48 kDa	0.18	0.22	GO:0000166, GO:0036402, GO:0017025, GO:0005524	Molecular function
Phenylalanine ammonia-lyase	PALY_CAMSI	Camellia sinensis	78 kDa	0.00046	1.24	GO:0016829, GO:0045548, GO:0016841	Molecular function
Predicted protein (Ferredoxin--NADP reductase, root isozyme, chloroplastic)	B9GG14_POPTR	Populus trichocarpa	42 kDa	0.073	0.96	GO:0004324	Molecular function
Isocitrate dehydrogenase [NADP]	P93133_EUCGL	Eucalyptus globulus	47 kDa	0.7	-0.29	GO:0051287, GO:0000287, GO:0004450, GO:0046872, GO:0005507	Molecular function
Uncharacterized protein	M0TLV9_MUSAM	Musa acuminata subsp. malaccensis	111 kDa	0.52	0.09	GO:0030976, GO:0016491, GO:0004591, GO:0016624, GO:0008270, GO:0050897	Molecular function
Dihydrolipoyl dehydrogenase	D2D319_GOSHI	Gossypium hirsutum	54 kDa	0.7	0.05	GO:0009055, GO:0050660, GO:0004148	Molecular function
Elongation factor 1-alpha	EF1A_TOBAC	Nicotiana tabacum	49 kDa	0.89	0.05	GO:0000166, GO:0003924, GO:0005525, GO:0003746	Molecular function
Phosphoglycerate kinase	I6LNT9_HELAN	Helianthus annuus	42 kDa	0.56	0.06	GO:0000166, GO:0016740, GO:0004618, GO:0005524	Molecular function
Fructose-bisphosphate aldolase	A9PEU6_POPTR	Populus trichocarpa	42 kDa	0.39	0.06	GO:0016829, GO:0004332	Molecular function
Uncharacterized protein	K4D5V2_SOLLC	Solanum lycopersicum	80 kDa	0.053	0.23	GO:0009055, GO:0051536, GO:0008137, GO:0009055, GO:0016491	Molecular function
NADH-ubiquinone oxidoreductase, putative	B9T118_RICCO	Ricinus communis	81 kDa	0.44	-0.33	GO:0051536, GO:0008137, GO:0009055	Molecular function
Poly(A)-binding protein	Q9M549_CUCSA	Cucumis sativus	71 kDa	0.031	0.3	GO:0003723	Molecular function
Heat shock protein 90	D0EWD6_IPONI	Ipomoea nil	90 kDa	0.53	0.01	GO:0005524, GO:0051082	Molecular function
Uncharacterized protein	M5W737_PRUPE	Prunus persica	64 kDa	0.44	0.15	GO:0005524	Molecular function
Chaperonin 60 subunit beta 1, chloroplastic	CPNB1_ARATH	Arabidopsis thaliana	64 kDa	0.74	-0.02	GO:0005524, GO:0051082, GO:0019904, GO:0000166, GO:0044183	Molecular function
6-phosphogluconate dehydrogenase, decarboxylating	B9VWD5_CUCSA	Cucumis sativus	54 kDa	0.3	-0.13	GO:0005515, GO:0004616	Molecular function
Cluster of Proton-translocating inorganic pyrophosphatase OS=Cucurbita moschata GN=PHP-1 PE=2 SV=1 (O82680_CUCMO)	O82680_CUCMO	Cucurbita moschata	81 kDa	0.053	-0.58	GO:0004427	Molecular function
Pyrophosphate-energized vacuolar membrane proton pump, putative	B9SXN6_RICCO	Ricinus communis	80 kDa	0.12	-0.55	GO:0009678, GO:0004427, GO:0032440	Molecular function
DnaJ protein homolog	DNJH_CUCSA	Cucumis sativus	46 kDa	0.047	0.31	GO:0005524, GO:0046872, GO:0051082, GO:0031072	Molecular function
Predicted protein	B9GKF8_POPTR	Populus trichocarpa	104 kDa	0.26	0.16	GO:0070006, GO:0042277, GO:0008270	Molecular function
Pyruvate kinase	I3STS9_LOTJA	Lotus japonicus	55 kDa	0.06	-0.14	GO:0000287, GO:0030955, GO:0004743, GO:0016301, GO:0003824	Molecular function
2,3-bisphosphoglycerate-independent phosphoglycerate mutase	PMGI_MESCR	Mesembryanthemum crystallinum	61 kDa	1	-0.01	GO:0030145, GO:0046872, GO:0004619	Molecular function
Phosphoenolpyruvate carboxylase protein	J9Y1K3_CUCSA	Cucumis sativus	110 kDa	0.032	-0.49	GO:0016829, GO:0008964	Molecular function
Uncharacterized protein	K4DF81_SOLLC	Solanum lycopersicum	36 kDa	1	0.05	GO:0045153, GO:0020037, GO:0045155, GO:0046872	Molecular function
Translationally-controlled tumor protein homolog	TCTP_CUCMA	Cucurbita maxima	19 kDa	0.64	0.06	NA	Molecular function
Plasma membrane proton pump	B3VDR8_CUCSA	Cucumis sativus	105 kDa	0.025	-0.25	GO:0000287, GO:0016787, GO:0005515, GO:0005524, GO:0008553, GO:0046872, GO:0000166	Molecular function
Enoyl-ACP reductase 1-1	D8KXZ6_ARAHY	Arachis hypogaea	41 kDa	0.89	0.09	NA	Molecular function
Predicted protein	A9RJ42_PHYPA	Physcomitrella patens subsp. patens	50 kDa	0.053	0.28	GO:0005524, GO:0036402, GO:0000166, GO:0017025	Molecular function
Phosphoenolpyruvate carboxykinase [ATP], putative	B9R6Q4_RICCO	Ricinus communis	73 kDa	0.0072	-0.73	GO:0017076, GO:0005524, GO:0016301, GO:0016829, GO:0004612	Molecular function
Putative uncharacterized protein	D7SJV2_VITVI	Vitis vinifera	43 kDa	0.7	0.01	NA	Molecular function
EBP1	A0FH76_SOLTU	Solanum tuberosum	43 kDa	0.25	0.18	NA	Molecular function
Ras-related protein RAB1BV	RB1BV_BETVU	Beta vulgaris	24 kDa	0.44	-0.31	GO:0005525, GO:0005515, GO:0000149, GO:0000166, GO:0003924	Molecular function
Uncharacterized protein	M5X008_PRUPE	Prunus persica	37 kDa	0.67	-0.49	GO:0016616, GO:0003824, GO:0004459	Molecular function
Uncharacterized protein	M0T7L5_MUSAM	Musa acuminata subsp. malaccensis	106 kDa	0.12	1.01	GO:0000166, GO:0005524	Molecular function
Chaperone protein ClpB3, chloroplastic	CLPB3_ARATH	Arabidopsis thaliana	109 kDa	0.15	0.23	GO:0005524, GO:0000166	Molecular function
Clathrin heavy chain, putative	B9SQP2_RICCO	Ricinus communis	193 kDa	0.0033	-0.26	GO:0005198, GO:0032051	Molecular function
Aspartic proteinase	ASPR_CUCPE	Cucurbita pepo	56 kDa	0.01	0.24	GO:0004190	Molecular function
Calmodulin	CALM_WHEAT	Triticum aestivum	17 kDa	0.011	0.41	GO:0019904, GO:0005509	Molecular function
40S ribosomal protein S3, putative	B9RK17_RICCO	Ricinus communis	26 kDa	1	0.16	GO:0003729, GO:0008534, GO:0003735, GO:0003723, GO:0003684	Molecular function
Citrate synthase	I3NNW9_PAESU	Paeonia suffruticosa	53 kDa	0.52	0.02	GO:0004108, GO:0016746, GO:0046912	Molecular function
4-alpha-glucanotransferase DPE2	DPE2_ORYSJ	Oryza sativa subsp. japonica	108 kDa	0.42	-0.11	GO:0004134, GO:2001070, GO:0016757, GO:0010297, GO:0030246	Molecular function
Short-chain dehydrogenase/reductase	E5GBL0_CUCME	Cucumis melo subsp. melo	108 kDa	0.063	-0.15	NA	Molecular function
Uncharacterized protein	I1K5M9_SOYBN	Glycine max	64 kDa	0.0072	-0.46	GO:0004614, GO:0000287	Molecular function
Phosphoglucomutase, cytoplasmic	PGMC_SOLTU	Solanum tuberosum	63 kDa	0.12	-0.93	GO:0016853, GO:0004614, GO:0000287, GO:0046872	Molecular function
RuBisCO large subunit-binding protein subunit alpha (Fragment)	RUBA_RICCO	Ricinus communis	52 kDa	0.92	-0.78	GO:0051082, GO:0000166, GO:0044183, GO:0005524	Molecular function
S-adenosylmethionine synthetase 1	B9HIH9_POPTR	Populus trichocarpa	43 kDa	0.82	0.01	GO:0016740, GO:0046872, GO:0005524, GO:0004478, GO:0000166	Molecular function
UDP-sugar pyrophosphorylase	USP_CUCME	Cucumis melo	68 kDa	0.59	-0.66	GO:0010491, GO:0047350, GO:0003983, GO:0047338, GO:0017103	Molecular function
40S ribosomal protein S5-1	RS51_ARATH	Arabidopsis thaliana	23 kDa	0.48	-0.26	GO:0019843, GO:0003729, GO:0003735	Molecular function
Peptidyl-prolyl cis-trans isomerase	CYPH_CATRO	Catharanthus roseus	18 kDa	0.88	0.02	GO:0003755	Molecular function
Uncharacterized protein (Adenylosuccinate synthetase, chloroplastic )	M5WBP0_PRUPE	Prunus persica	54 kDa	0.7	0.02	GO:0005525, GO:0000166, GO:0000287, GO:0004019	Molecular function
Glucose-1-phosphate adenylyltransferase	O22658_CITLA	Citrullus lanatus	58 kDa	0.39	-0.13	GO:0016779, GO:0016740, GO:0008878, GO:0000166, GO:0005524	Molecular function
Putative uncharacterized protein	A9NWJ6_PICSI	Picea sitchensis	41 kDa	0.18	-0.34	GO:0004739, GO:0003824	Molecular function
2,3-bisphosphoglycerate-independent phosphoglycerate mutase	B7FLD9_MEDTR	Medicago truncatula	61 kDa	0.51	-0.09	GO:0030145, GO:0004619, GO:0003824	Molecular function
Monodehydroascorbate reductase	MDAR_PEA	Pisum sativu	47 kDa	0.25	0.22	GO:0050660, GO:0016656	Molecular function
Putative uncharacterized protein	A5B126_VITVI	Vitis vinifera	15 kDa	0.78	0	GO:0003735	Molecular function
40S ribosomal protein S15a-1	R15A1_ARATH	Arabidopsis thaliana	15 kDa	0.053	-0.8	GO:0003735	Molecular function
NADH dehydrogenase subunit 9	E6ZE24_BETVM	Beta vulgaris subsp. maritima	23 kDa	0.46	-0.1	GO:0008137	Molecular function
ATPase subunit 4	D5I3E4_CUCPE	Cucurbita pepo	22 kDa	0.26	-0.26	GO:0015078	Molecular function
Putative uncharacterized protein	A2YP57_ORYSI	Oryza sativa subsp. indica	15 kDa	0.67	-0.11	NA	Molecular function
Histone H4 variant TH011	H41_WHEAT	Triticum aestivum	11 kDa	0.67	-0.1	GO:0046982, GO:0003677	Molecular function
Chaperone protein ClpC1, chloroplastic	CLPC1_ORYSJ	Oryza sativa subsp. japonica	102 kDa	0.11	0.64	GO:0042803, GO:0005524, GO:0016887, GO:0008233, GO:0000166	Molecular function
Dihydrolipoamide acetyltransferase component of pyruvate dehydrogenase	E5GB89_CUCME	Cucumis melo subsp. melo	58 kDa	0.7	0.03	GO:0004742	Molecular function
Uncharacterized protein	M5X2C2_PRUPE	Prunus persica	67 kDa	0.022	-0.27	GO:0046872, GO:0051287, GO:0004470, GO:0004471	Molecular function
Uncharacterized protein	K4DFR1_SOLLC	Solanum lycopersicum	69 kDa	0.4	-0.12	GO:0005524, GO:0046933	Molecular function
V-type proton ATPase catalytic subunit A	VATA_BRANA	Brassica napus	69 kDa	0.034	-0.27	GO:0005524, GO:0046933, GO:0005524, GO:0000166, GO:0016787	Molecular function
Uncharacterized protein	M0ZZ08_SOLTU	Solanum tuberosum	39 kDa	0.26	-0.21	GO:0004739, GO:0003824	Molecular function
Putative uncharacterized protein	A5B5R1_VITVI	Vitis vinifera	33 kDa	0.89	-0.03	NA	Molecular function
60S acidic ribosomal protein P0	RLA0_SOYBN	Glycine max	34 kDa	0.0047	-0.37	NA	Molecular function
Glucose-6-phosphate isomerase	A9S7W2_PHYPA	Physcomitrella patens subsp. patens	61 kDa	0.16	0.29	GO:0016853, GO:0004347	Molecular function
Putative 97 kDa heat shock protein	L8BSJ3_MUSBA	Musa balbisiana	94 kDa	0.25	0.81	GO:0000166, GO:0005524	Molecular function
Proteasome subunit alpha type	B9T3X8_RICCO	Ricinus communis	26 kDa	0.26	-0.85	GO:0004298, GO:0004175	Molecular function
Putative uncharacterized protein	D7TKK5_VITVI	Vitis vinifera	44 kDa	0.7	0.08	GO:0016787, GO:0043023, GO:0043022, GO:0000166, GO:0005525, GO:0005524, GO:0016887	Molecular function
GTP-binding protein	Q9M7P3_CAPAN	Capsicum annuum	44 kDa	0.44	-0.6	GO:0043023, GO:0000166, GO:0005525, GO:0016887, GO:0005524, GO:0043022, GO:0005524	Molecular function
Aspartate aminotransferase, chloroplastic	AAT5_ARATH	Arabidopsis thaliana	50 kDa	0.31	-0.14	GO:0004069, GO:0030170, GO:0080130, GO:0003824	Molecular function
Putative uncharacterized protein	B8AJ67_ORYSI	Oryza sativa subsp. indica	61 kDa	0.25	0.87	GO:0003723, GO:0003676	Molecular function
Glucose-1-phosphate adenylyltransferase	B6RQ84_GOSHI	Gossypium hirsutum	57 kDa	0.76	-0.03	GO:0008878, GO:0005524, GO:0000166	Molecular function
Putative uncharacterized protein Sb04g010020	C5XZM3_SORBI	Sorghum bicolor	133 kDa	0.4	0.09	NA	Molecular function
Triosephosphate isomerase	A9PH17_POPTR	Populus trichocarpa	34 kDa	0.44	0.27	GO:0004807	Molecular function
Uncharacterized protein	M5VZS0_PRUPE	Prunus persica	27 kDa	0.94	0.1	GO:0004807, GO:0005507	Molecular function
Predicted protein	B9HBV6_POPTR	Populus trichocarpa	29 kDa	0.053	-0.42	GO:0016491	Molecular function
Methylenetetrahydrofolate reductase	B9HG95_POPTR	Populus trichocarpa	68 kDa	0.67	-0.15	GO:0004489, GO:0016491	Molecular function
Putative uncharacterized protein	A5C8L8_VITVI	Vitis vinifera	98 kDa	0.7	-0.04	GO:0016491, GO:0050660	Molecular function
Chloroplast monodehydroascorbate reductase	C3VPH7_AVIMR	Avicennia marina	50 kDa	0.053	-0.25	GO:0016656, GO:0050660	Molecular function
T-complex protein 1 subunit alpha	I1K467_SOYBN	Glycine max	59 kDa	0.062	-0.21	GO:0044183, GO:0000166, GO:0051082, GO:0051082, GO:0005524	Molecular function
V-type proton ATPase subunit B 1	VATB1_GOSHI	Gossypium hirsutum	54 kDa	0.58	0.06	GO:0042626, GO:0016787, GO:0005524	Molecular function
Eukaryotic translation initiation factor 5A-3	IF5A3_SOLLC	Solanum lycopersicum	17 kDa	0.053	-0.43	GO:0003723, GO:0003743, GO:0043022	Molecular function
Endoplasmin homolog	ENPL_HORVU	Hordeum vulgare	93 kDa	0.0018	-0.29	GO:0005524, GO:0051082, GO:0000166	Molecular function
Uncharacterized protein	I1LZ93_SOYBN	Glycine max	40 kDa	0.7	-0.75	GO:0051287, GO:0004449, GO:0016616, GO:0000287	Molecular function
3-isopropylmalate dehydrogenase, chloroplastic	LEU3_SOLTU	Solanum tuberosum	40 kDa	0.67	-0.07	GO:0000287, GO:0004449, GO:0051287, GO:0016491, GO:0046872, GO:0003862	Molecular function
Acetyl CoA carboxylase (Fragment)	A3RL33_CAMSI	Camellia sinensis	158 kDa	0.086	-0.22	GO:0003989, GO:0005524, GO:0046872, GO:0000166, GO:0004075	Molecular function
Uncharacterized protein	A2ZXM9_ORYSJ	Oryza sativa subsp. japonica	58 kDa	0.25	-0.5	GO:0003872, GO:0046872, GO:0005524, GO:0016301, GO:0000166, GO:0004222	Molecular function
Uncharacterized protein	K4C4W6_SOLLC	Solanum lycopersicum	50 kDa	1	-0.01	GO:0000166, GO:0005525, GO:0005200, GO:0003924	Molecular function
Glutamine synthetase cytosolic isozyme	GLNA1_LOTJA	Lotus japonicus	39 kDa	0.12	0.52	GO:0005507, GO:0005524, GO:0004356, GO:0016874, GO:0000166, GO:0003735	Molecular function
40S ribosomal protein S9-1	B3H7J6_ARATH	Arabidopsis thaliana	19 kDa	0.25	-0.49	GO:0003735, GO:0019843	Molecular function
Superoxide dismutase [Cu-Zn]	A1ED47_GOSAR	Gossypium arboreum	22 kDa	0.7	0.29	GO:0046872, GO:0004784, GO:0016491	Molecular function
Probable fructose-bisphosphate aldolase 2, chloroplastic	ALFC2_ARATH	Arabidopsis thaliana	43 kDa	0.16	-0.17	NA	Molecular function
Predicted protein	B9IIQ4_POPTR	Populus trichocarpa	29 kDa	0.7	-0.07	GO:0016491	Molecular function
Probable methionine--tRNA ligase	SYM_ORYSJ	Oryza sativa subsp. japonica	89 kDa	0.48	-0.4	GO:0000166, GO:0005524, GO:0000049, GO:0004825	Molecular function
Granule-bound starch synthase	G1JSF0_CUCMO	Cucurbita moschata	68 kDa	0.44	0.17	GO:0009011, GO:0004373, GO:0016740	Molecular function
Gamma-glutamylcysteine synthetase	K9JCZ2_CUCSA	Cucumis sativus	59 kDa	0.32	-0.26	GO:0016874, GO:0004357, GO:0003824	Molecular function
Putative uncharacterized protein (NADH dehydrogenase, putative )	A5C820_VITVI	Vitis vinifera	69 kDa	0.57	-0.14	GO:0005509, GO:0008137	Molecular function
40S ribosomal protein S8	A5AUZ0_VITVI	Vitis vinifera	25 kDa	1	0.02	GO:0003735	Molecular function
L-ascorbate oxidase	ASO_CUCMA	Cucurbita maxima	65 kDa	0.066	0.29	GO:0005507, GO:0008447	Molecular function
Uncharacterized protein	M5XQR4_PRUPE	Prunus persica	112 kDa	0.67	-0.12	GO:0030234	Molecular function
Adenylosuccinate synthetase, chloroplastic	I1N933_SOYBN	Glycine max	53 kDa	0.57	-0.06	GO:0000166, GO:0004019, GO:0000287, GO:0005525	Molecular function
Aspartate aminotransferase, cytoplasmic	AATC_DAUCA	Daucus carota	44 kDa	0.26	-0.64	GO:0030170, GO:0004069, GO:0003824	Molecular function
Citrate synthase, glyoxysomal	CYSZ_CUCMA	Cucurbita maxima	57 kDa	0.0093	-0.23	GO:0046912, GO:0016746	Molecular function
Predicted protein (Fragment) (Succinate dehydrogenase )	B9HEW3_POPTR	Populus trichocarpa	70 kDa	0.18	-0.29	GO:0000104, GO:0008177, GO:0050660, GO:0009055	Molecular function
Chloroplast biotin carboxylase	A5HJL1_GOSHI	Gossypium hirsutum	59 kDa	0.12	0.08	GO:0046872, GO:0005524, GO:0000166, GO:0003824, GO:0004075	Molecular function
Uncharacterized protein	C6TKV3_SOYBN	Glycine max	46 kDa	0.7	-0.09	GO:0003824, GO:0016616	Molecular function
3-phosphoshikimate 1-carboxyvinyltransferase	Q946U9_9LAMI	Dicliptera chinensis	55 kDa	0.25	-0.13	GO:0003866, GO:0016740	Molecular function
Pyruvate kinase	D7MSA3_ARALL	Arabidopsis lyrata subsp. lyrata	64 kDa	0.89	-0.02	GO:0016301, GO:0000287, GO:0030955, GO:0004743	Molecular function
At5g47540	B3LFB8_ARATH	Arabidopsis thaliana	39 kDa	0.7	0.01	NA	Molecular function
40S ribosomal protein S13-1	RS131_ARATH	Arabidopsis thaliana	17 kDa	0.16	-0.25	GO:0003735, GO:0070181	Molecular function
Protein argonaute 4A	AGO4A_ORYSJ	Oryza sativa subsp. japonica	101 kDa	0.29	-0.15	GO:0003676	Molecular function
Putative uncharacterized protein	A9P8E9_POPTR	Populus trichocarpa	16 kDa	0.44	0.17	GO:0048027, GO:0003735, GO:0070181	Molecular function
40S ribosomal protein S14	RS142_MAIZE	Zea mays	16 kDa	0.073	-0.24	GO:0003735	Molecular function
Guanine nucleotide-binding family protein	D7L7Z8_ARALL	Arabidopsis lyrata subsp. lyrata	36 kDa	0.25	-0.15	GO:0005078	Molecular function
Uncharacterized protein (60S ribosomal protein L7 )	M5XTN9_PRUPE	Prunus persica	28 kDa	0.14	-0.18	GO:0003729, GO:0003735	Molecular function
4-hydroxy-3-methylbut-2-en-1-yl diphosphate synthase	K7NBL1_SIRGR	Siraitia grosvenorii	82 kDa	0.7	-0.13	GO:0046429, GO:0003824, GO:0005506	Molecular function
Pyruvate kinase	B7FLG2_MEDTR	Medicago truncatula	54 kDa	0.7	0.05	GO:0003824, GO:0000287, GO:0004743, GO:0016301, GO:0030955	Molecular function
Putative uncharacterized protein	F6GWF3_VITVI	Vitis vinifera	52 kDa	0.7	0.18	GO:0004372, GO:0016740, GO:0030170, GO:0003824	Molecular function
Cysteine protease inhibitor (Fragment)	G0ZS05_CUCMA	Cucurbita maxima	11 kDa	0.034	0.44	GO:0004869, GO:0008233	Molecular function
Phenylalanine ammonia-lyase 2	PAL2_LITER	Lithospermum erythrorhizon	77 kDa	0.00046	1.46	GO:0045548, GO:0016841, GO:0016829	Molecular function
Adenylosuccinate synthetase 2, chloroplastic	PURA2_RICCO	Ricinus communis	53 kDa	0.67	-0.01	GO:0046872, GO:0004019, GO:0005525, GO:0000166	Molecular function
Fumarate hydratase 1, mitochondrial	FUM1_ARATH	Arabidopsis thaliana	53 kDa	0.087	-0.35	GO:0005515, GO:0003824, GO:0004333	Molecular function
Nitrate reductase [NADH]	NIA_CUCMA	Cucurbita maxima	103 kDa	0.11	-0.22	GO:0043546, GO:0030151, GO:0020037, GO:0046872, GO:0009703	Molecular function
Putative uncharacterized protein	C6T531_SOYBN	Glycine max	21 kDa	0.57	-0.04	GO:0003735	Molecular function
Ubiquinol oxidase	D4P4J8_CITLA	Citrullus lanatus	40 kDa	0.066	-0.44	GO:0046872, GO:0009916, GO:0046872	Molecular function
Putative uncharacterized protein	A9NK66_PICSI	Picea sitchensis	5 kDa	0.44	0.42	NA	Molecular function
Ras-related protein RABA1b	RAA1B_ARATH	Arabidopsis thaliana	24 kDa	0.32	-0.17	GO:0003924, GO:0005525, GO:0000166	Molecular function
Uncharacterized protein	I1N1M0_SOYBN	Glycine max	58 kDa	0.7	-0.07	GO:0000166, GO:0003872, GO:0016301, GO:0046872, GO:0005524	Molecular function
6-phosphofructokinase 5, chloroplastic	K6PF5_ARATH	Arabidopsis thaliana	59 kDa	0.78	-0.03	NA	Molecular function
Dihydrolipoyl dehydrogenase, mitochondrial	DLDH_PEA	Pisum sativum	53 kDa	0.012	-0.41	GO:0009055, GO:0016491, GO:0004148, GO:0050660	Molecular function
Uncharacterized protein	R0IC76_9BRAS	Capsella rubella	61 kDa	0.2	-0.19	GO:0004619, GO:0003824, GO:0030145	Molecular function
Putative uncharacterized protein Sb03g029720	C5XF87_SORBI	Sorghum bicolor	63 kDa	0.24	-0.13	GO:0016491, GO:0004455, GO:0046872	Molecular function
Csf-1 protein (Fragment)	Q9SXL9_CUCSA	Cucumis sativus	16 kDa	0.7	0.78	GO:0003735	Molecular function
Phosphoglycerate kinase (Fragment)	G8EW39_9POAL	Kengyilia alatavica	31 kDa	0.7	-0.04	GO:0016301, GO:0004618	Molecular function
Putative uncharacterized protein	F6GXU4_VITVI	Vitis vinifera	128 kDa	0.053	0.55	GO:0005524, GO:0008641, GO:0000166, GO:0004839	Molecular function
Ubiquitin-activating enzyme E1 3	UBE13_WHEAT	Triticum aestivum	116 kDa	0.4	-0.08	GO:0005524, GO:0016874, GO:0000166, GO:0008641	Molecular function
Proteasome subunit alpha type	A5AXI5_VITVI	Vitis vinifera	27 kDa	0.12	0.6	GO:0004175, GO:0004298	Molecular function
Probable 26S proteasome non-ATPase regulatory subunit 3	PSMD3_TOBAC	Nicotiana tabacum	56 kDa	0.19	-0.22	GO:0030234	Molecular function
Predicted protein	B9HRZ1_POPTR	Populus trichocarpa	113 kDa	0.1	-0.23	GO:0003824, GO:0046872	Molecular function
Putative uncharacterized protein	A2XVU7_ORYSI	Oryza sativa subsp. indica	55 kDa	0.26	0.24	GO:0004386, GO:0005524, GO:0000166	Molecular function
Elongation factor Tu, chloroplastic	EFTU1_SOYBN	Glycine max	52 kDa	0.011	0.2	GO:0003924, GO:0000166, GO:0005525, GO:0003746	Molecular function
Putative glyoxysomal fatty acid beta-oxidation multifunctional protein	B1Q485_CAPCH	Capsicum chinense	79 kDa	0.26	-0.27	GO:0003824, GO:0003857	Molecular function
Superoxide dismutase (Fragment)	Q6QGY4_CITLA	Citrullus lanatus	16 kDa	0.16	0.2	GO:0016491, GO:0046872, GO:0004784	Molecular function
40S ribosomal protein S16	RS16_GOSHI	Gossypium hirsutum	16 kDa	0.26	-0.2	GO:0003735	Molecular function
Putative uncharacterized protein	B7FN60_MEDTR	Medicago truncatula	19 kDa	0.25	0.47	GO:0046872	Molecular function
Glycine--tRNA ligase 1, mitochondrial	SYGM1_ARATH	Arabidopsis thaliana	82 kDa	0.17	0.1	GO:0000166, GO:0046983, GO:0005524, GO:0004820	Molecular function
Predicted protein	A9PBR7_POPTR	Populus trichocarpa	21 kDa	0.7	0	GO:0003723, GO:0003735	Molecular function
Predicted protein	B9IBF2_POPTR	Populus trichocarpa	45 kDa	0.6	-0.15	GO:0016874, GO:0005524, GO:0004775, GO:0000287, GO:0005507, GO:0000166, GO:0003824	Molecular function
Peptidyl-prolyl cis-trans isomerase	CYPX_USEUD	Unspecified eudicot	18 kDa	0.2	0.33	GO:0003755	Molecular function
Uncharacterized protein	M0ZY64_SOLTU	Solanum tuberosum	38 kDa	0.7	0.05	GO:0016740	Molecular function
Spermidine synthase 1	SPD1_HYONI	Hyoscyamus niger	35 kDa	0.25	-0.13	GO:0004766, GO:0016740	Molecular function
Adenylate kinase A	KAD1_ORYSJ	Oryza sativa subsp. japonica	26 kDa	0.44	-0.18	GO:0016776, GO:0019205, GO:0000166, GO:0005524, GO:0004017, GO:0016301	Molecular function
Glutathione peroxidase	B9RCA6_RICCO	Ricinus communis	19 kDa	0.67	0.47	GO:0004602, GO:0016491	Molecular function
TCP domain class transcription factor	D9ZJD1_MALDO	Malus domestica	57 kDa	0.4	0.05	GO:0000166, GO:0051082, GO:0005524	Molecular function
Proteasome subunit alpha type	A5C3G9_VITVI	Vitis vinifera	31 kDa	0.57	-0.02	GO:0004298, GO:0004175	Molecular function
Proteasome subunit alpha type-4	PSA4_PETHY	Petunia hybrida	27 kDa	0.32	0.09	GO:0004175, GO:0004298	Molecular function
Malate dehydrogenase, glyoxysomal	MDHG_CITLA	Citrullus lanatus	38 kDa	0.76	-0.02	GO:0030060, GO:0016616, GO:0016491	Molecular function
Coatomer subunit beta	I1KG56_SOYBN	Glycine max	106 kDa	0.25	0.46	GO:0005198	Molecular function
Fumarylacetoacetate hydrolase, putative	B9S3J5_RICCO	Ricinus communis	46 kDa	0.44	0.1	GO:0016787, GO:0004334	Molecular function
Putative uncharacterized protein	A5AEB0_VITVI	Vitis vinifera	47 kDa	0.76	0.02	GO:0005198	Molecular function
Uncharacterized protein	I1L117_SOYBN	Glycine max	87 kDa	0.09	-0.46	GO:0061630, GO:0031625	Molecular function
Acyl-coenzyme A oxidase, peroxisomal	ACOX2_CUCMA	Cucurbita maxima	77 kDa	0.32	-0.41	GO:0003997, GO:0071949, GO:0016616	Molecular function
Predicted protein	B9HU92_POPTR	Populus trichocarpa	43 kDa	0.89	0.11	GO:0004739, GO:0016624	Molecular function
40S ribosomal protein S6	A2XHI9_ORYSI	Oryza sativa subsp. indica	29 kDa	1	0.05	GO:0003735	Molecular function
Probable phospholipid hydroperoxide glutathione peroxidase	GPX4_GOSHI	Gossypium hirsutum	19 kDa	0.39	0.1	GO:0047066, GO:0004602	Molecular function
Dimeric phloem specific lectin PP2	Q42383_CUCMA	Cucurbita maxima	24 kDa	0.011	0.36	GO:0030246	Molecular function
Uncharacterized protein	M5XHS7_PRUPE	Prunus persica	15 kDa	0.7	0.2	GO:0003735	Molecular function
Uncharacterized protein	M0SJM4_MUSAM	Musa acuminata subsp. malaccensis	57 kDa	0.4	0.23	GO:0016491, GO:0004455	Molecular function
Calreticulin-2	CALR2_ARATH	Arabidopsis thaliana	48 kDa	0.44	0.17	GO:0030246, GO:0005509, GO:0051082	Molecular function
Uncharacterized protein	B4FZU5_MAIZE	Zea mays	24 kDa	0.7	0.05	GO:0016740, GO:0016757, GO:0003824	Molecular function
60S ribosomal protein L8-1	RL81_ARATH	Arabidopsis thaliana	28 kDa	0.94	-0.02	GO:0003729, GO:0003723, GO:0003735, GO:0005515	Molecular function
Putative uncharacterized protein	A5BL32_VITVI	Vitis vinifera	40 kDa	0.25	-0.16	GO:0051903, GO:0008270	Molecular function
Alcohol dehydrogenase class-3	ADHX_PEA	Pisum sativum	40 kDa	0.16	-0.19	GO:0008270, GO:0051903, GO:0004022, GO:0046872	Molecular function
NADH-ubiquinone oxidoreductase flavoprotein	E5GBX7_CUCME	Cucumis melo subsp. melo	53 kDa	0.21	-0.1	GO:0008137, GO:0051287, GO:0046872, GO:0051539, GO:0010181	Molecular function
Glutamate-1-semialdehyde 21-aminomutase	E5GCQ7_CUCME	Cucumis melo subsp. melo	50 kDa	0.44	0.15	GO:0030170, GO:0003824, GO:0016740, GO:0042286, GO:0008483	Molecular function
Putative uncharacterized protein	A5C9G0_VITVI	Vitis vinifera	18 kDa	0.01	-0.7	GO:0003735, GO:0019843	Molecular function
Importin subunit alpha	K4AWF0_SOLLC	Solanum lycopersicum	59 kDa	0.056	0.22	GO:0008139, GO:0008565	Molecular function
ADP,ATP carrier protein 1, chloroplastic	TLC1_ARATH	Arabidopsis thaliana	68 kDa	0.048	-0.7	GO:0005524, GO:0005471, GO:0000166	Molecular function
V-type proton ATPase subunit D	VATD_ARATH	Arabidopsis thaliana	29 kDa	0.89	0.03	GO:0042626	Molecular function
Uncharacterized protein	C6TJL2_SOYBN	Glycine max	44 kDa	0.32	-0.05	GO:0005198	Molecular function
Late-embryogenesis abundant protein 2	C6T750_SOYBN	Glycine max	34 kDa	0.79	0.02	NA	Molecular function
Putative uncharacterized protein	F6I5Y5_VITVI	Vitis vinifera	69 kDa	0.12	-0.62	GO:0004617, GO:0005524, GO:0051287	Molecular function
Xylose isomerase	D7MNC2_ARALL	Arabidopsis lyrata subsp. lyrata	54 kDa	0.053	-0.41	GO:0016853, GO:0009045, GO:0046872	Molecular function
NADH dehydrogenase subunit 7	D5I3D0_CITLA	Citrullus lanatus	45 kDa	0.055	-0.2	GO:0008137, GO:0016651, GO:0051287, GO:0003954, GO:0048038	Molecular function
Succinate dehydrogenase	E5GCD7_CUCME	Cucumis melo subsp. melo	31 kDa	0.48	0.05	GO:0051537, GO:0008177, GO:0051538, GO:0016491, GO:0009055, GO:0051539, GO:0008177, GO:0046872	Molecular function
V-type proton ATPase subunit E	VATE_MESCR	Mesembryanthemum crystallinum	26 kDa	0.48	0.07	GO:0046961, GO:0046933	Molecular function
Glycolate oxidase	Q39640_9ROSI	Cucurbita cv. Kurokawa Amakuri	40 kDa	0.67	-0.01	GO:0052853, GO:0010181, GO:0052854, GO:0008964, GO:0052852	Molecular function
Predicted protein	D7LXS6_ARALL	Arabidopsis lyrata subsp. lyrata	59 kDa	0.78	0.66	GO:0005524, GO:0044183, GO:0000166, GO:0051082	Molecular function
Uncharacterized protein	I1JIN5_SOYBN	Glycine max	71 kDa	0.12	0.39	GO:0004553, GO:0008422	Molecular function
Thylakoid-bound ascorbate peroxidase (Precursor)	O04873_9ROSI	Cucurbita cv. Kurokawa Amakuri	46 kDa	0.92	0.02	GO:0020037, GO:0016688, GO:0016491	Molecular function
Probable pre-mRNA-splicing factor ATP-dependent RNA helicase	DHX15_ARATH	Arabidopsis thaliana	83 kDa	0.1	-0.29	NA	Molecular function
Putative uncharacterized protein	D7SY46_VITVI	Vitis vinifera	60 kDa	0.7	-0.1	GO:0050660, GO:0016668, GO:0009055	Molecular function
Diphosphomevalonate decarboxylase	K7NBV8_SIRGR	Siraitia grosvenorii	46 kDa	0.016	-0.26	GO:0016831, GO:0016829, GO:0004163, GO:0005524, GO:0000166	Molecular function
Uncharacterized protein	K7KRS4_SOYBN	Glycine max	52 kDa	0.16	-0.18	GO:0005524, GO:0016301, GO:0003872, GO:0046872, GO:0000166	Molecular function
Putative uncharacterized protein	A2Y6U4_ORYSI	Oryza sativa subsp. indica	54 kDa	0.57	-0.06	GO:0016301, GO:0004396, GO:0005536, GO:0005524, GO:0000166	Molecular function
Arginine biosynthesis bifunctional protein ArgJ, chloroplastic	ARGJ_CITLA	Citrullus lanatus	48 kDa	0.48	-0.14	GO:0004358, GO:0004042, GO:0016740	Molecular function
Proteasome subunit beta type	C6TLJ9_SOYBN	Glycine max	29 kDa	0.4	0.09	GO:0004298, GO:0008233	Molecular function
Glucose-6-phosphate 1-dehydrogenase 2, chloroplastic	G6PD2_ARATH	Arabidopsis thaliana	67 kDa	0.48	-0.12	GO:0050661, GO:0004345, GO:0016491	Molecular function
Eukaryotic translation initiation factor 6	D7LV66_ARALL	Arabidopsis lyrata subsp. lyrata	27 kDa	0.26	0.12	GO:0043022, GO:0003743, GO:0043023	Molecular function
Inosine-5'-monophosphate dehydrogenase	A7XZM6_CAMSI	Camellia sinensis	53 kDa	0.67	0.01	GO:0003938, GO:0046872, GO:0000166, GO:0003824	Molecular function
Ferredoxin--nitrite reductase	B6SY01_MAIZE	Zea mays	66 kDa	0.053	-0.74	GO:0051536, GO:0020037, GO:0016491	Molecular function
Malic enzyme	K4CLL3_SOLLC	Solanum lycopersicum	65 kDa	0.7	-0.38	GO:0004471, GO:0046872, GO:0051287	Molecular function
NADP-dependent malic enzyme	MAOX_POPTR	Populus trichocarpa	65 kDa	0.44	-0.13	GO:0051287, GO:0004471, GO:0008948, GO:0046872, GO:0004473	Molecular function
Predicted protein	B9HX41_POPTR	Populus trichocarpa	21 kDa	0.57	0.07	GO:0015631	Molecular function
Superoxide dismutase [Cu-Zn]	A8CF89_POPAL	Populus alba	22 kDa	0.0047	0.84	GO:0004784, GO:0016491, GO:0046872	Molecular function
Cytochrome b-c1 complex subunit Rieske, mitochondrial	UCRI_SOLTU	Solanum tuberosum	29 kDa	0.0047	-0.45	GO:0051537, GO:0016491, GO:0008121, GO:0008121, GO:0046872	Molecular function
Putative uncharacterized protein	A5AS18_VITVI	Vitis vinifera	22 kDa	0.48	0.16	GO:0003955, GO:0010181	Molecular function
Neutral alpha-glucosidase ab, putative	B9S1M1_RICCO	Ricinus communis	111 kDa	0.12	0.28	GO:0004558, GO:0030246, GO:0032450, GO:0004553	Molecular function
60S ribosomal protein L13	A5CB91_VITVI	Vitis vinifera	24 kDa	0.31	-0.29	GO:0003735	Molecular function
NADH dehydrogenase [ubiquinone] iron-sulfur protein 7, mitochondrial	NDUS7_ARATH	Arabidopsis thaliana	24 kDa	0.89	0.01	GO:0008137, GO:0008270, GO:0051539, GO:0016491, GO:0048038, GO:0051536, GO:0003954	Molecular function
Putative uncharacterized protein	B7FMA7_MEDTR	Medicago truncatula	22 kDa	0.25	-0.31	GO:0000166, GO:0005525	Molecular function
GTP-binding protein SAR1	SAR1_TOBAC	Nicotiana tabacum	23 kDa	0.7	-0.03	GO:0005525, GO:0000166	Molecular function
Chloroplast transketolase	G8EX76_CUCSA	Cucumis sativus	81 kDa	0.053	0.86	GO:0004802, GO:0016740	Molecular function
Putative uncharacterized protein	B7FJA2_MEDTR	Medicago truncatula	26 kDa	0.89	0.17	NA	Molecular function
Phospholipase D alpha 1	PLDA1_VIGUN	Vigna unguiculata	92 kDa	0.36	0.11	GO:0004630, GO:0005509, GO:0070290, GO:0016787	Molecular function
Beta-adaptin-like protein B	APBLB_ARATH	Arabidopsis thaliana	99 kDa	0.056	-0.27	GO:0008565	Molecular function
Ribulose bisphosphate carboxylase large chain (Fragment)	RBL_ERICA	Eriodictyon californicum	52 kDa	0.48	0.14	GO:0016984, GO:0016829, GO:0016491, GO:0000287, GO:0004497	Molecular function
Putative uncharacterized protein	A5BGG6_VITVI	Vitis vinifera	32 kDa	0.034	0.95	GO:0019888, GO:0043130	Molecular function
Peptidyl-prolyl cis-trans isomerase FKBP12	FKB12_VICFA	Vicia faba	12 kDa	0.066	-0.33	GO:0003755	Molecular function
Uncharacterized protein	I1KPV1_SOYBN	Glycine max	55 kDa	0.056	-0.35	GO:0008270, GO:0004222, GO:0003824, GO:0008270	Molecular function
Cysteine synthase	CYSK_CITLA	Citrullus lanatus	34 kDa	0.57	0.16	GO:0047458, GO:0004124, GO:0016829, GO:0050461, GO:0050234	Molecular function
Uncharacterized protein	K7MK66_SOYBN	Glycine max	107 kDa	0.48	0.08	GO:0051015	Molecular function
UTP--glucose-1-phosphate uridylyltransferase	UGPA_SOLTU	Solanum tuberosum	52 kDa	0.78	0.05	GO:0016740, GO:0003983	Molecular function
Probable aldo-keto reductase 2	AKR2_ORYSI	Oryza sativa subsp. indica	38 kDa	0.048	0.23	GO:0016491	Molecular function
Serine hydroxymethyltransferase, mitochondrial	GLYM_PEA	Pisum sativum	57 kDa	0.01	-0.37	GO:0004372, GO:0030170, GO:0016740, GO:0008168	Molecular function
Uncharacterized protein	M5XQ24_PRUPE	Prunus persica	48 kDa	0.32	0.09	GO:0005524, GO:0003676	Molecular function
DEAD-box ATP-dependent RNA helicase 15	RH15_ARATH	Arabidopsis thaliana	48 kDa	0.84	-0.02	GO:0005515, GO:0016887, GO:0003676, GO:0004004, GO:0003725, GO:0000166, GO:0003690, GO:0003697, GO:0005524	Molecular function
Pyrroline-5-carboxylate synthetase	G3M0R4_CUCME	Cucumis melo	78 kDa	0.74	0.1	GO:0004350, GO:0016491, GO:0016301, GO:0004349, GO:0000166, GO:0005524	Molecular function
Ras-related protein Rab7	RAB7_SOYBN	Glycine max	23 kDa	0.44	-0.22	GO:0005525, GO:0003924, GO:0000166	Molecular function
Predicted protein (Ferredoxin-dependent glutamate synthase)	B9IHR5_POPTR	Populus trichocarpa	163 kDa	0.053	0.22	GO:0015930	Molecular function
Acetyl-CoA C-acyltransferase (3-ketoacyl-coa thiolase b) (Fragment)	Q42918_MANIN	Mangifera indica	45 kDa	0.7	-0.73	GO:0003824, GO:0003988, GO:0016740	Molecular function
Glutathione reductase	I6P8E9_9ROSI	Dimocarpus longan	60 kDa	0.011	0.77	GO:0050660, GO:0004362, GO:0009055, GO:0016667, GO:0050661	Molecular function
Chloroplast NADP-dependent glyceraldehyde 3-phosphate dehydrogenase B subunit (Fragment)	Q9FV16_CUCPE	Cucurbita pepo	18 kDa	0.36	-0.15	GO:0016620	Molecular function
Putative uncharacterized protein	A5ASG9_VITVI	Vitis vinifera	58 kDa	0.32	0.41	GO:0003676, GO:0003723	Molecular function
Uncharacterized protein	I1JMZ4_SOYBN	Glycine max	22 kDa	0.36	0.19	NA	Molecular function
Alcohol dehydrogenase class-3	ADHX_ARATH	Arabidopsis thaliana	41 kDa	0.4	-0.24	GO:0051903, GO:0046872, GO:0008270, GO:0004022	Molecular function
T-complex protein 1 subunit epsilon	TCPE_ARATH	Arabidopsis thaliana	59 kDa	0.52	0.26	GO:0000166, GO:0005515, GO:0005524, GO:0044183, GO:0051082	Molecular function
40S ribosomal protein S11	RS11_MAIZE	Zea mays	18 kDa	0.048	-0.85	GO:0019843, GO:0003735	Molecular function
Phospho-2-dehydro-3-deoxyheptonate aldolase 1, chloroplast, putative	B9T0A7_RICCO	Ricinus communis	59 kDa	0.78	0.02	GO:0003849, GO:0016740	Molecular function
Uncharacterized protein	I1JGP8_SOYBN	Glycine max	60 kDa	0.16	0.28	GO:0004177, GO:0030145, GO:0008235	Molecular function
Uncharacterized protein	M0RVC5_MUSAM	Musa acuminata subsp. malaccensis	14 kDa	0.44	0.12	GO:0003735	Molecular function
Ras-related protein RABA4a	RAA4A_ARATH	Arabidopsis thaliana	25 kDa	0.78	-0.07	GO:0003924, GO:0000166, GO:0005525	Molecular function
Proteasome subunit beta type-2-B	PSB2B_ARATH	Arabidopsis thaliana	22 kDa	0.89	0.05	GO:0004298, GO:0008233	Molecular function
Uncharacterized protein	I1JGR4_SOYBN	Glycine max	86 kDa	0.72	0.09	GO:0003723	Molecular function
60S ribosomal protein L10-1	RL101_ORYSI	Oryza sativa subsp. indica	25 kDa	0.09	-0.42	GO:0003735	Molecular function
Ketol-acid reductoisomerase, chloroplastic	ILV5_PEA	Pisum sativum	63 kDa	0.26	-0.34	GO:0004455, GO:0016491, GO:0046872	Molecular function
Uridine kinase	B9GJS2_POPTR	Populus trichocarpa	54 kDa	0.44	-0.07	GO:0005524, GO:0000166, GO:0004849, GO:0005525, GO:0016740, GO:0004845	Molecular function
Putative uncharacterized protein	D8RV35_SELML	Selaginella moellendorffii	71 kDa	1	-0.31	GO:0000166, GO:0051082, GO:0005524	Molecular function
Alpha-1,4-glucan-protein synthase [UDP-forming]	UPTG_MAIZE	Zea mays	41 kDa	0.0081	-0.23	GO:0016757, GO:0016866, GO:0016866	Molecular function
Ketol-acid reductoisomerase, chloroplastic	ILV5_ORYSJ	Oryza sativa subsp. japonica	62 kDa	0.013	-0.41	GO:0016491, GO:0070402, GO:0042803, GO:0004455, GO:0000287	Molecular function
U5 small nuclear ribonucleoprotein 200 kDa helicase	G7IJ55_MEDTR	Medicago truncatula	252 kDa	0.7	0.66	GO:0003676, GO:0005524, GO:0004386	Molecular function
Putative uncharacterized protein	B8LLU9_PICSI	Picea sitchensis	82 kDa	0.12	-0.36	GO:0003918, GO:0005524, GO:0003677, GO:0003916, GO:0000166, GO:0016853	Molecular function
DEAD-box ATP-dependent RNA helicase 2	RH2_ARATH	Arabidopsis thaliana	46 kDa	0.7	0.09	GO:0004004, GO:0005524, GO:0000166, GO:0003729	Molecular function
Predicted protein	B9H9T9_POPTR	Populus trichocarpa	104 kDa	0.48	0.1	GO:0051015	Molecular function
Predicted protein	B9GSH1_POPTR	Populus trichocarpa	35 kDa	0.4	0.2	NA	Molecular function
Uncharacterized protein	M4DUK0_BRARP	Brassica rapa subsp. pekinensis	22 kDa	0.67	0.04	GO:0003735, GO:0003723	Molecular function
GDP-D-mannose-3',5'-epimerase	A0EJL8_MALGL	Malpighia glabra	43 kDa	0.32	-0.16	GO:0047918, GO:0050662, GO:0051287, GO:0003824	Molecular function
Protein grpE, putative	B9SYX8_RICCO	Ricinus communis	34 kDa	0.23	-0.27	GO:0051087, GO:0016853, GO:0000774, GO:0042803	Molecular function
Phosphoribosylformylglycinamidine cyclo-ligase	A9S752_PHYPA	Physcomitrella patens subsp. patens	35 kDa	0.0072	0.34	GO:0004641	Molecular function
Cysteine synthase	A8ISA9_CHLRE	Chlamydomonas reinhardtii	38 kDa	0.25	-0.7	GO:0004124, GO:0030170, GO:0016740	Molecular function
Proteasome subunit beta type	B7FH05_MEDTR	Medicago truncatula	23 kDa	1	0	GO:0004298	Molecular function
Cysteine synthase	A9PJI4_9ROSI	Populus trichocarpa x Populus deltoides	43 kDa	0.44	0.18	GO:0016740, GO:0004124	Molecular function
Succinyl-CoA ligase [ADP-forming] subunit alpha-1, mitochondrial	SUCA1_SOLLC	Solanum lycopersicum	35 kDa	0.53	0.05	GO:0000166, GO:0016874, GO:0048037, GO:0004775, GO:0003824, GO:0004776	Molecular function
DNA damage-binding protein 1a	DDB1A_ARATH	Arabidopsis thaliana	121 kDa	0.39	-0.23	GO:0003684, GO:0005515	Molecular function
Eukaryotic translation initiation factor 3 subunit D	B9H2U0_POPTR	Populus trichocarpa	63 kDa	0.24	-0.15	GO:0003743	Molecular function
Putative uncharacterized protein	B8LR96_PICSI	Picea sitchensis	68 kDa	0.7	0.17	GO:0000166, GO:0016887, GO:0043024, GO:0005506, GO:0005524	Molecular function
Uncharacterized protein	M5XKS7_PRUPE	Prunus persica	98 kDa	0.011	0.39	GO:0003824, GO:0030246, GO:0004553	Molecular function
NADP-dependent malic enzyme 4, chloroplastic	MAOP4_ARATH	Arabidopsis thaliana	71 kDa	0.78	-0.14	GO:0008948, GO:0050897, GO:0004473, GO:0008270, GO:0051287, GO:0004471, GO:0042803, GO:0046872	Molecular function
Serine-threonine protein kinase, plant-type, putative	B9RI89_RICCO	Ricinus communis	40 kDa	0.57	-0.03	GO:0032440, GO:0016491, GO:0016301	Molecular function
Predicted protein	B9GI44_POPTR	Populus trichocarpa	86 kDa	0.14	0.2	GO:0003676, GO:0016787, GO:0004386, GO:0004004, GO:0005524, GO:0000166	Molecular function
Glucose-6-phosphate 1-dehydrogenase, cytoplasmic isoform 1	G6PD5_ARATH	Arabidopsis thaliana	59 kDa	0.16	-0.24	GO:0050661, GO:0016491, GO:0004345	Molecular function
Phenylalanine ammonia-lyase (Fragment)	Q43211_WHEAT	Triticum aestivum	37 kDa	0.053	1.67	GO:0016841, GO:0016829	Molecular function
Eukaryotic peptide chain release factor subunit 1-1	ERF1X_ARATH	Arabidopsis thaliana	49 kDa	0.94	0.01	GO:0003747	Molecular function
Peroxisomal (S)-2-hydroxy-acid oxidase GLO5	GLO5_ORYSI	Oryza sativa subsp. indica	40 kDa	0.7	0.24	GO:0008891, GO:0016491, GO:0052854, GO:0052853, GO:0052852, GO:0010181	Molecular function
Uncharacterized protein	M5VQX2_PRUPE	Prunus persica	27 kDa	0.26	0.11	GO:0004175, GO:0004298	Molecular function
Proteasome subunit alpha type-7	PSA7_CICAR	Cicer arietinum	27 kDa	0.12	0.2	GO:0004298, GO:0004175	Molecular function
Formate dehydrogenase, mitochondrial	FDH_HORVU	Hordeum vulgare	42 kDa	0.57	-0.34	GO:0016616, GO:0008863, GO:0051287	Molecular function
Transketolase, chloroplastic	TKTC_SPIOL	Spinacia oleracea	80 kDa	0.89	0.05	GO:0004802, GO:0046872	Molecular function
Coatomer subunit gamma-2	COPG2_ORYSJ	Oryza sativa subsp. japonica	99 kDa	0.78	0.08	GO:0005198	Molecular function
Uncharacterized protein	K4CMS0_SOLLC	Solanum lycopersicum	120 kDa	0.7	-0.14	GO:0030246, GO:0004553, GO:0003824	Molecular function
Probable protein phosphatase 2C 10	P2C10_ORYSJ	Oryza sativa subsp. japonica	38 kDa	0.028	0.11	GO:0004722, GO:0016787, GO:0046872	Molecular function
Putative pyruvate dehydrogenase E3 subunit	B5LAW5_CAPAN	Capsicum annuum	61 kDa	1	0.03	GO:0009055, GO:0050660, GO:0016668	Molecular function
Leucine aminopeptidase, chloroplastic	AMPL_SOLTU	Solanum tuberosum	60 kDa	0.94	0.04	GO:0004177, GO:0030145, GO:0008235	Molecular function
Predicted protein (Fragment)	B9NDN5_POPTR	Populus trichocarpa	86 kDa	0.72	-0.2	NA	Molecular function
Uncharacterized protein	K4CBF0_SOLLC	Solanum lycopersicum	60 kDa	0.7	0.16	GO:0004742	Molecular function
ATP synthase subunit beta	F6GTT2_VITVI	Vitis vinifera	59 kDa	1	-0.19	GO:0005886, GO:0009507, GO:0016020, GO:0000275	Cellular component
Heat shock protein 70	Q9M4E7_CUCSA	Cucumis sativus	71 kDa	0.038	0.23	GO:0005634, GO:0005783, GO:0005788, GO:0005793, GO:0008180, GO:0009507, GO:0009507, GO:0009536, GO:0009570, GO:0016592, GO:0030176, GO:0031012, GO:0034663, GO:0070062	Cellular component
Alpha-1,4 glucan phosphorylase	B2DG14_CUCMA	Cucurbita maxima	96 kDa	0.39	0.08	GO:0005829, GO:0009507	Cellular component
Polyubiquitin (Fragment)	UBIQP_ACECL	Acetabularia cliftonii	47 kDa	0.25	0.48	GO:0005634, GO:0005829, GO:0005840, GO:0005886	Cellular component
Glyceraldehyde-3-phosphate dehydrogenase	G3PC_SINAL	Sinapis alba	37 kDa	0.54	-0.18	NA	Cellular component
ATP synthase subunit alpha	Q8SID6_9ERIC	Palaquium formosanum	43 kDa	0.77	-0.01	GO:0005739, GO:0005743, GO:0016020, GO:0045261	Cellular component
Heat shock protein 90-1	B6EBD7_SOYBN	Glycine max	80 kDa	0.36	0.12	GO:0005634, GO:0005774, GO:0005794, GO:0005829, GO:0005886, GO:0009570, GO:0048046	Cellular component
Uncharacterized protein	I1LXY1_SOYBN	Glycine max	89 kDa	0.54	0.06	GO:0005576, GO:0005829	Cellular component
Predicted protein	A9P8Q7_POPTR	Populus trichocarpa	29 kDa	0.43	0.29	GO:0005634, GO:0005634, GO:0005829, GO:0005886, GO:0009507	Cellular component
Alkaline alpha galactosidase 3	H6WX41_CUCSA	Cucumis sativus	86 kDa	0.092	-0.35	NA	Cellular component
Putative uncharacterized protein (enolase were in cluster)	D7T227_VITVI	Vitis vinifera	48 kDa	0.21	-0.34	GO:0000015	Cellular component
Adenine nucleotide translocator	E5GB77_CUCME	Cucumis melo subsp. melo	42 kDa	0.084	-0.81	GO:0005739, GO:0005743, GO:0016021	Cellular component
Malate dehydrogenase (Fragment)	A1BQK6_CUCSA	Cucumis sativus	14 kDa	0.7	0.03	GO:0005737	Cellular component
UDP-glucose pyrophosphorylase	Q19TV8_CUCME	Cucumis melo	52 kDa	0.6	-0.03	GO:0005737	Cellular component
Aconitate hydratase, cytoplasmic	ACOC_CUCMA	Cucurbita maxima	98 kDa	0.88	-0.03	GO:0005739, GO:0005773, GO:0005774, GO:0005794, GO:0005829, GO:0005886, GO:0009507, GO:0009570, GO:0048046	Cellular component
Fructose-bisphosphate aldolase	K4D3E4_SOLLC	Solanum lycopersicum	38 kDa	0.32	0.2	GO:0005737	Cellular component
Phosphorylase	B2DG13_CUCMA	Cucurbita maxima	109 kDa	0.0059	0.2	NA	Cellular component
Chaperonin CPN60-2, mitochondrial	CH62_CUCMA	Cucurbita maxima	61 kDa	0.04	-0.88	GO:0005739, GO:0005829	Cellular component
Uncharacterized protein	K7MS29_SOYBN	Glycine max	164 kDa	0.078	-0.28	GO:0005739, GO:0005739, GO:0009507, GO:0009536, GO:0009570, GO:0009941	Cellular component
Putative uncharacterized protein	F6HQQ7_VITVI	Vitis vinifera	112 kDa	0.89	-0.24	NA	Cellular component
4-alpha-glucanotransferase, putative	B9SCF0_RICCO	Ricinus communis	104 kDa	0.44	-0.22	NA	Cellular component
Glucose-6-phosphate isomerase	E0CQ39_VITVI	Vitis vinifera	63 kDa	1	-0.17	GO:0005829	Cellular component
Peptidyl-prolyl cis-trans isomerase	G3CU70_MOMCH	Momordica charantia	18 kDa	1	-0.03	NA	Cellular component
Hexokinase 1	B6V3C0_CUCME	Cucumis melo	54 kDa	0.89	-0.1	GO:0005634, GO:0005739, GO:0005741, GO:0005773, GO:0005774, GO:0005829, GO:0009536, GO:0016021	Cellular component
Galactokinase	B6V3B9_CUCME	Cucumis melo	55 kDa	0.13	-0.28	GO:0005737	Cellular component
Putative uncharacterized protein	D8R6D5_SELML	Selaginella moellendorffii	68 kDa	0.44	0.62	NA	Cellular component
Heat shock 70 kDa protein, mitochondrial	HSP7M_PHAVU	Phaseolus vulgaris	73 kDa	0.0042	0.4	GO:0005739	Cellular component
2,3-bisphosphoglycerate-independent phosphoglycerate mutase	PMGI_RICCO	Ricinus communis	61 kDa	0.28	-0.19	GO:0005737	Cellular component
Malate dehydrogenase	A8MQK3_ARATH	Arabidopsis thaliana	33 kDa	0.82	0.01	GO:0005739, GO:0005759, GO:0009507, GO:0016020, GO:0048046	Cellular component
Putative uncharacterized protein	A5AQD0_VITVI	Vitis vinifera	12 kDa	0.12	0.67	GO:0005739, GO:0005758, GO:0070469	Cellular component
Elongation factor EF-2	G7IH33_MEDTR	Medicago truncatula	94 kDa	0.068	-0.2	GO:0005737	Cellular component
Putative uncharacterized protein	A5AEB9_VITVI	Vitis vinifera	45 kDa	0.043	-0.23	GO:0031595, GO:0031597	Cellular component
26S protease regulatory subunit 6B homolog	PRS6B_ARATH	Arabidopsis thaliana	46 kDa	0.16	-0.16	GO:0005634, GO:0005829, GO:0016020, GO:0031595, GO:0031597	Cellular component
Actin 1	M4WH59_DIOMU	Dionaea muscipula	42 kDa	0.65	0.1	GO:0005737, GO:0005856	Cellular component
UDP-glucose 4-epimerase 5	UGE5_ARATH	Arabidopsis thaliana	39 kDa	0.92	-0.06	NA	Cellular component
Putative eukaryotic translation initiation factor 4A (Fragment)	Q5K406_9CARY	Silene viscosa	19 kDa	0.78	-0.1	NA	Cellular component
Mitochondrial processing peptidase beta subunit	Q9AXQ2_CUCME	Cucumis melo	59 kDa	0.011	-0.37	GO:0005750	Cellular component
Glutathione S-transferase	Q8GT24_CUCMA	Cucurbita maxima	23 kDa	0.016	0.26	NA	Cellular component
Predicted protein	A9RP29_PHYPA	Physcomitrella patens subsp. patens	24 kDa	0.58	-0.66	GO:0005829, GO:0016021	Cellular component
D-3-phosphoglycerate dehydrogenase, putative	B9RYA3_RICCO	Ricinus communis	63 kDa	0.39	-0.95	GO:0005739, GO:0009507, GO:0009570, GO:0016020	Cellular component
Probable sucrose-phosphate synthase 2	SPSA2_CRAPL	Craterostigma plantagineum	121 kDa	0.87	0.04	GO:0005794, GO:0005829, GO:0005886	Cellular component
Annexin	E5GCK3_CUCME	Cucumis melo subsp. melo	72 kDa	0.027	-0.26	NA	Cellular component
Histone H2B	A2IBL2_NICBE	Nicotiana benthamiana	16 kDa	0.25	0.2	GO:0000786, GO:0005634, GO:0005694	Cellular component
Predicted protein	B9MTE3_POPTR	Populus trichocarpa	90 kDa	0.8	-0.02	GO:0005634, GO:0005794, GO:0005829, GO:0005856, GO:0009524	Cellular component
Mitochondrial phosphate carrier protein, putative	B9RH00_RICCO	Ricinus communis	39 kDa	0.053	-0.91	GO:0005743, GO:0016021, GO:0032592	Cellular component
Putative uncharacterized protein	D7TFJ4_VITVI	Vitis vinifera	48 kDa	0.1	0.36	GO:0005737	Cellular component
Pyruvate kinase	D7LUD2_ARALL	Arabidopsis lyrata subsp. lyrata	57 kDa	0.024	-0.47	GO:0005737, GO:0005829, GO:0016020	Cellular component
Thioredoxin	Q8H9E2_CUCMA	Cucurbita maxima	13 kDa	0.09	0.56	NA	Cellular component
Uncharacterized protein	M5XRY7_PRUPE	Prunus persica	52 kDa	0.016	-0.36	GO:0005634, GO:0005829	Cellular component
Beta-amylase	F6HS29_VITVI	Vitis vinifera	52 kDa	0.78	-0.04	NA	Cellular component
Predicted protein	B9HCM7_POPTR	Populus trichocarpa	48 kDa	0.18	0.22	GO:0031595, GO:0031597	Cellular component
Phenylalanine ammonia-lyase	PALY_CAMSI	Camellia sinensis	78 kDa	0.00046	1.24	GO:0005737	Cellular component
Predicted protein (Ferredoxin--NADP reductase, root isozyme, chloroplastic)	B9GG14_POPTR	Populus trichocarpa	42 kDa	0.073	0.96	GO:0009507	Cellular component
Isocitrate dehydrogenase [NADP]	P93133_EUCGL	Eucalyptus globulus	47 kDa	0.7	-0.29	GO:0005829, GO:0005886, GO:0009507, GO:0009570, GO:0048046	Cellular component
Uncharacterized protein	M0TLV9_MUSAM	Musa acuminata subsp. malaccensis	111 kDa	0.52	0.09	GO:0005739, GO:0005829, GO:0045252	Cellular component
Dihydrolipoyl dehydrogenase	D2D319_GOSHI	Gossypium hirsutum	54 kDa	0.7	0.05	NA	Cellular component
Elongation factor 1-alpha	EF1A_TOBAC	Nicotiana tabacum	49 kDa	0.89	0.05	GO:0005737	Cellular component
Phosphoglycerate kinase	I6LNT9_HELAN	Helianthus annuus	42 kDa	0.56	0.06	GO:0009507, GO:0009536	Cellular component
Fructose-bisphosphate aldolase	A9PEU6_POPTR	Populus trichocarpa	42 kDa	0.39	0.06	NA	Cellular component
Uncharacterized protein	K4D5V2_SOLLC	Solanum lycopersicum	80 kDa	0.053	0.23	GO:0005739, GO:0005747, GO:0009507, GO:0016020, GO:0031966, GO:0045271, GO:0045272	Cellular component
NADH-ubiquinone oxidoreductase, putative	B9T118_RICCO	Ricinus communis	81 kDa	0.44	-0.33	GO:0016020	Cellular component
Poly(A)-binding protein	Q9M549_CUCSA	Cucumis sativus	71 kDa	0.031	0.3	GO:0005737	Cellular component
Heat shock protein 90	D0EWD6_IPONI	Ipomoea nil	90 kDa	0.53	0.01	NA	Cellular component
Uncharacterized protein	M5W737_PRUPE	Prunus persica	64 kDa	0.44	0.15	GO:0005737	Cellular component
Chaperonin 60 subunit beta 1, chloroplastic	CPNB1_ARATH	Arabidopsis thaliana	64 kDa	0.74	-0.02	GO:0005739, GO:0005794, GO:0005829, GO:0005886, GO:0009507, GO:0009536, GO:0009570, GO:0009941, GO:0010319, GO:0022626, GO:0022626, GO:0048046	Cellular component
6-phosphogluconate dehydrogenase, decarboxylating	B9VWD5_CUCSA	Cucumis sativus	54 kDa	0.3	-0.13	GO:0005829, GO:0009570, GO:0019822	Cellular component
Cluster of Proton-translocating inorganic pyrophosphatase OS=Cucurbita moschata GN=PHP-1 PE=2 SV=1 (O82680_CUCMO)	O82680_CUCMO	Cucurbita moschata	81 kDa	0.053	-0.58	GO:0016021	Cellular component
Pyrophosphate-energized vacuolar membrane proton pump, putative	B9SXN6_RICCO	Ricinus communis	80 kDa	0.12	-0.55	GO:0016021	Cellular component
DnaJ protein homolog	DNJH_CUCSA	Cucumis sativus	46 kDa	0.047	0.31	GO:0005886, GO:0016020	Cellular component
Predicted protein	B9GKF8_POPTR	Populus trichocarpa	104 kDa	0.26	0.16	GO:0005737	Cellular component
Pyruvate kinase	I3STS9_LOTJA	Lotus japonicus	55 kDa	0.06	-0.14	NA	Cellular component
2,3-bisphosphoglycerate-independent phosphoglycerate mutase	PMGI_MESCR	Mesembryanthemum crystallinum	61 kDa	1	-0.01	GO:0005737	Cellular component
Phosphoenolpyruvate carboxylase protein	J9Y1K3_CUCSA	Cucumis sativus	110 kDa	0.032	-0.49	GO:0005829, GO:0009507, GO:0048046	Cellular component
Uncharacterized protein	K4DF81_SOLLC	Solanum lycopersicum	36 kDa	1	0.05	GO:0005750	Cellular component
Translationally-controlled tumor protein homolog	TCTP_CUCMA	Cucurbita maxima	19 kDa	0.64	0.06	GO:0005737	Cellular component
Plasma membrane proton pump	B3VDR8_CUCSA	Cucumis sativus	105 kDa	0.025	-0.25	GO:0005634, GO:0005773, GO:0005794, GO:0005886, GO:0016021	Cellular component
Enoyl-ACP reductase 1-1	D8KXZ6_ARAHY	Arachis hypogaea	41 kDa	0.89	0.09	NA	Cellular component
Predicted protein	A9RJ42_PHYPA	Physcomitrella patens subsp. patens	50 kDa	0.053	0.28	GO:0016021, GO:0031595, GO:0031597	Cellular component
Phosphoenolpyruvate carboxykinase [ATP], putative	B9R6Q4_RICCO	Ricinus communis	73 kDa	0.0072	-0.73	GO:0005829	Cellular component
Putative uncharacterized protein	D7SJV2_VITVI	Vitis vinifera	43 kDa	0.7	0.01	NA	Cellular component
EBP1	A0FH76_SOLTU	Solanum tuberosum	43 kDa	0.25	0.18	NA	Cellular component
Ras-related protein RAB1BV	RB1BV_BETVU	Beta vulgaris	24 kDa	0.44	-0.31	GO:0000139, GO:0000139, GO:0000407, GO:0005783, GO:0005789, GO:0005794, GO:0005795, GO:0005801, GO:0005829, GO:0005886, GO:0016021, GO:0031410, GO:0034045	Cellular component
Uncharacterized protein	M5X008_PRUPE	Prunus persica	37 kDa	0.67	-0.49	GO:0005737	Cellular component
Uncharacterized protein	M0T7L5_MUSAM	Musa acuminata subsp. malaccensis	106 kDa	0.12	1.01	GO:0009507	Cellular component
Chaperone protein ClpB3, chloroplastic	CLPB3_ARATH	Arabidopsis thaliana	109 kDa	0.15	0.23	GO:0009507, GO:0009570, GO:0009570	Cellular component
Clathrin heavy chain, putative	B9SQP2_RICCO	Ricinus communis	193 kDa	0.0033	-0.26	GO:0005773, GO:0005774, GO:0005794, GO:0005829, GO:0005886, GO:0005905, GO:0016021, GO:0030130, GO:0030132, GO:0030659, GO:0031410, GO:0071439	Cellular component
Aspartic proteinase	ASPR_CUCPE	Cucurbita pepo	56 kDa	0.01	0.24	GO:0005773	Cellular component
Calmodulin	CALM_WHEAT	Triticum aestivum	17 kDa	0.011	0.41	GO:0005737	Cellular component
40S ribosomal protein S3, putative	B9RK17_RICCO	Ricinus communis	26 kDa	1	0.16	GO:0005634, GO:0005773, GO:0005774, GO:0005794, GO:0005829, GO:0009507, GO:0015935, GO:0022626, GO:0022627	Cellular component
Citrate synthase	I3NNW9_PAESU	Paeonia suffruticosa	53 kDa	0.52	0.02	NA	Cellular component
4-alpha-glucanotransferase DPE2	DPE2_ORYSJ	Oryza sativa subsp. japonica	108 kDa	0.42	-0.11	GO:0005737, GO:0005829	Cellular component
Short-chain dehydrogenase/reductase	E5GBL0_CUCME	Cucumis melo subsp. melo	108 kDa	0.063	-0.15	NA	Cellular component
Uncharacterized protein	I1K5M9_SOYBN	Glycine max	64 kDa	0.0072	-0.46	GO:0005829, GO:0009570, GO:0010319, GO:0010319	Cellular component
Phosphoglucomutase, cytoplasmic	PGMC_SOLTU	Solanum tuberosum	63 kDa	0.12	-0.93	GO:0005737	Cellular component
RuBisCO large subunit-binding protein subunit alpha (Fragment)	RUBA_RICCO	Ricinus communis	52 kDa	0.92	-0.78	GO:0005739, GO:0005829, GO:0009507, GO:0009570, GO:0009941, GO:0016020, GO:0022626, GO:0048046	Cellular component
S-adenosylmethionine synthetase 1	B9HIH9_POPTR	Populus trichocarpa	43 kDa	0.82	0.01	GO:0005829	Cellular component
UDP-sugar pyrophosphorylase	USP_CUCME	Cucumis melo	68 kDa	0.59	-0.66	GO:0005829	Cellular component
40S ribosomal protein S5-1	RS51_ARATH	Arabidopsis thaliana	23 kDa	0.48	-0.26	GO:0005774, GO:0005829, GO:0005886, GO:0009507, GO:0022626, GO:0042788	Cellular component
Peptidyl-prolyl cis-trans isomerase	CYPH_CATRO	Catharanthus roseus	18 kDa	0.88	0.02	GO:0005737	Cellular component
Uncharacterized protein (Adenylosuccinate synthetase, chloroplastic )	M5WBP0_PRUPE	Prunus persica	54 kDa	0.7	0.02	GO:0009507	Cellular component
Glucose-1-phosphate adenylyltransferase	O22658_CITLA	Citrullus lanatus	58 kDa	0.39	-0.13	GO:0009507, GO:0009536	Cellular component
Putative uncharacterized protein	A9NWJ6_PICSI	Picea sitchensis	41 kDa	0.18	-0.34	GO:0005739, GO:0005759	Cellular component
2,3-bisphosphoglycerate-independent phosphoglycerate mutase	B7FLD9_MEDTR	Medicago truncatula	61 kDa	0.51	-0.09	GO:0005737	Cellular component
Monodehydroascorbate reductase	MDAR_PEA	Pisum sativu	47 kDa	0.25	0.22	GO:0005737	Cellular component
Putative uncharacterized protein	A5B126_VITVI	Vitis vinifera	15 kDa	0.78	0	GO:0005840	Cellular component
40S ribosomal protein S15a-1	R15A1_ARATH	Arabidopsis thaliana	15 kDa	0.053	-0.8	GO:0005739, GO:0005774, GO:0005794, GO:0005829, GO:0005840, GO:0005886, GO:0022626, GO:0022627, GO:0022627, GO:0042788	Cellular component
NADH dehydrogenase subunit 9	E6ZE24_BETVM	Beta vulgaris subsp. maritima	23 kDa	0.46	-0.1	GO:0005739	Cellular component
ATPase subunit 4	D5I3E4_CUCPE	Cucurbita pepo	22 kDa	0.26	-0.26	GO:0005739, GO:0016021, GO:0000276	Cellular component
Putative uncharacterized protein	A2YP57_ORYSI	Oryza sativa subsp. indica	15 kDa	0.67	-0.11	NA	Cellular component
Histone H4 variant TH011	H41_WHEAT	Triticum aestivum	11 kDa	0.67	-0.1	GO:0000786, GO:0005634, GO:0005694, GO:0005730, GO:0005773, GO:0005774, GO:0005829, GO:0005886, GO:0009507	Cellular component
Chaperone protein ClpC1, chloroplastic	CLPC1_ORYSJ	Oryza sativa subsp. japonica	102 kDa	0.11	0.64	GO:0005739, GO:0009507, GO:0009570, GO:0009941, GO:0031969	Cellular component
Dihydrolipoamide acetyltransferase component of pyruvate dehydrogenase	E5GB89_CUCME	Cucumis melo subsp. melo	58 kDa	0.7	0.03	GO:0005759, GO:0045254	Cellular component
Uncharacterized protein	M5X2C2_PRUPE	Prunus persica	67 kDa	0.022	-0.27	NA	Cellular component
Uncharacterized protein	K4DFR1_SOLLC	Solanum lycopersicum	69 kDa	0.4	-0.12	GO:0000325, GO:0005774, GO:0005886, GO:0033180	Cellular component
V-type proton ATPase catalytic subunit A	VATA_BRANA	Brassica napus	69 kDa	0.034	-0.27	GO:0033180	Cellular component
Uncharacterized protein	M0ZZ08_SOLTU	Solanum tuberosum	39 kDa	0.26	-0.21	GO:0005739, GO:0005759	Cellular component
Putative uncharacterized protein	A5B5R1_VITVI	Vitis vinifera	33 kDa	0.89	-0.03	GO:0005840	Cellular component
60S acidic ribosomal protein P0	RLA0_SOYBN	Glycine max	34 kDa	0.0047	-0.37	GO:0005840	Cellular component
Glucose-6-phosphate isomerase	A9S7W2_PHYPA	Physcomitrella patens subsp. patens	61 kDa	0.16	0.29	GO:0005829, GO:0009507, GO:0009570, GO:0009941	Cellular component
Putative 97 kDa heat shock protein	L8BSJ3_MUSBA	Musa balbisiana	94 kDa	0.25	0.81	NA	Cellular component
Proteasome subunit alpha type	B9T3X8_RICCO	Ricinus communis	26 kDa	0.26	-0.85	GO:0005634, GO:0005737	Cellular component
Putative uncharacterized protein	D7TKK5_VITVI	Vitis vinifera	44 kDa	0.7	0.08	GO:0005737	Cellular component
GTP-binding protein	Q9M7P3_CAPAN	Capsicum annuum	44 kDa	0.44	-0.6	GO:0005737	Cellular component
Aspartate aminotransferase, chloroplastic	AAT5_ARATH	Arabidopsis thaliana	50 kDa	0.31	-0.14	GO:0009501, GO:0009507, GO:0009570, GO:0009941, GO:0010319, GO:0048046	Cellular component
Putative uncharacterized protein	B8AJ67_ORYSI	Oryza sativa subsp. indica	61 kDa	0.25	0.87	GO:0005634	Cellular component
Glucose-1-phosphate adenylyltransferase	B6RQ84_GOSHI	Gossypium hirsutum	57 kDa	0.76	-0.03	GO:0009501, GO:0009507	Cellular component
Putative uncharacterized protein Sb04g010020	C5XZM3_SORBI	Sorghum bicolor	133 kDa	0.4	0.09	NA	Cellular component
Triosephosphate isomerase	A9PH17_POPTR	Populus trichocarpa	34 kDa	0.44	0.27	GO:0005739, GO:0005829, GO:0009507, GO:0009570, GO:0009941, GO:0048046	Cellular component
Uncharacterized protein	M5VZS0_PRUPE	Prunus persica	27 kDa	0.94	0.1	GO:0005739, GO:0005773, GO:0005774, GO:0005829, GO:0005886, GO:0009507, GO:0009570, GO:0048046	Cellular component
Predicted protein	B9HBV6_POPTR	Populus trichocarpa	29 kDa	0.053	-0.42	NA	Cellular component
Methylenetetrahydrofolate reductase	B9HG95_POPTR	Populus trichocarpa	68 kDa	0.67	-0.15	GO:0005829	Cellular component
Putative uncharacterized protein	A5C8L8_VITVI	Vitis vinifera	98 kDa	0.7	-0.04	NA	Cellular component
Chloroplast monodehydroascorbate reductase	C3VPH7_AVIMR	Avicennia marina	50 kDa	0.053	-0.25	NA	Cellular component
T-complex protein 1 subunit alpha	I1K467_SOYBN	Glycine max	59 kDa	0.062	-0.21	GO:0005832	Cellular component
V-type proton ATPase subunit B 1	VATB1_GOSHI	Gossypium hirsutum	54 kDa	0.58	0.06	GO:0033180	Cellular component
Eukaryotic translation initiation factor 5A-3	IF5A3_SOLLC	Solanum lycopersicum	17 kDa	0.053	-0.43	NA	Cellular component
Endoplasmin homolog	ENPL_HORVU	Hordeum vulgare	93 kDa	0.0018	-0.29	GO:0005783, GO:0005788	Cellular component
Uncharacterized protein	I1LZ93_SOYBN	Glycine max	40 kDa	0.7	-0.75	GO:0005739	Cellular component
3-isopropylmalate dehydrogenase, chloroplastic	LEU3_SOLTU	Solanum tuberosum	40 kDa	0.67	-0.07	GO:0009507	Cellular component
Acetyl CoA carboxylase (Fragment)	A3RL33_CAMSI	Camellia sinensis	158 kDa	0.086	-0.22	GO:0005737, GO:0005829	Cellular component
Uncharacterized protein	A2ZXM9_ORYSJ	Oryza sativa subsp. japonica	58 kDa	0.25	-0.5	GO:0005737	Cellular component
Uncharacterized protein	K4C4W6_SOLLC	Solanum lycopersicum	50 kDa	1	-0.01	GO:0005737, GO:0005856, GO:0005874	Cellular component
Glutamine synthetase cytosolic isozyme	GLNA1_LOTJA	Lotus japonicus	39 kDa	0.12	0.52	GO:0005886, GO:0009507, GO:0022626, GO:0042788	Cellular component
40S ribosomal protein S9-1	B3H7J6_ARATH	Arabidopsis thaliana	19 kDa	0.25	-0.49	GO:0005840, GO:0015935	Cellular component
Superoxide dismutase [Cu-Zn]	A1ED47_GOSAR	Gossypium arboreum	22 kDa	0.7	0.29	NA	Cellular component
Probable fructose-bisphosphate aldolase 2, chloroplastic	ALFC2_ARATH	Arabidopsis thaliana	43 kDa	0.16	-0.17	NA	Cellular component
Predicted protein	B9IIQ4_POPTR	Populus trichocarpa	29 kDa	0.7	-0.07	NA	Cellular component
Probable methionine--tRNA ligase	SYM_ORYSJ	Oryza sativa subsp. japonica	89 kDa	0.48	-0.4	GO:0005737, GO:0005829	Cellular component
Granule-bound starch synthase	G1JSF0_CUCMO	Cucurbita moschata	68 kDa	0.44	0.17	GO:0009501, GO:0009507	Cellular component
Gamma-glutamylcysteine synthetase	K9JCZ2_CUCSA	Cucumis sativus	59 kDa	0.32	-0.26	GO:0009507, GO:0009536, GO:0009570	Cellular component
Putative uncharacterized protein (NADH dehydrogenase, putative )	A5C820_VITVI	Vitis vinifera	69 kDa	0.57	-0.14	NA	Cellular component
40S ribosomal protein S8	A5AUZ0_VITVI	Vitis vinifera	25 kDa	1	0.02	GO:0005840, GO:0022627	Cellular component
L-ascorbate oxidase	ASO_CUCMA	Cucurbita maxima	65 kDa	0.066	0.29	GO:0005576	Cellular component
Uncharacterized protein	M5XQR4_PRUPE	Prunus persica	112 kDa	0.67	-0.12	NA	Cellular component
Adenylosuccinate synthetase, chloroplastic	I1N933_SOYBN	Glycine max	53 kDa	0.57	-0.06	GO:0009507	Cellular component
Aspartate aminotransferase, cytoplasmic	AATC_DAUCA	Daucus carota	44 kDa	0.26	-0.64	GO:0005777, GO:0005829, GO:0009507, GO:0009536, GO:0016020	Cellular component
Citrate synthase, glyoxysomal	CYSZ_CUCMA	Cucurbita maxima	57 kDa	0.0093	-0.23	GO:0005777, GO:0009514	Cellular component
Predicted protein (Fragment) (Succinate dehydrogenase )	B9HEW3_POPTR	Populus trichocarpa	70 kDa	0.18	-0.29	GO:0005743, GO:0016020, GO:0045282, GO:0005749	Cellular component
Chloroplast biotin carboxylase	A5HJL1_GOSHI	Gossypium hirsutum	59 kDa	0.12	0.08	NA	Cellular component
Uncharacterized protein	C6TKV3_SOYBN	Glycine max	46 kDa	0.7	-0.09	GO:0005737	Cellular component
3-phosphoshikimate 1-carboxyvinyltransferase	Q946U9_9LAMI	Dicliptera chinensis	55 kDa	0.25	-0.13	NA	Cellular component
Pyruvate kinase	D7MSA3_ARALL	Arabidopsis lyrata subsp. lyrata	64 kDa	0.89	-0.02	GO:0005739, GO:0009507, GO:0009570	Cellular component
At5g47540	B3LFB8_ARATH	Arabidopsis thaliana	39 kDa	0.7	0.01	NA	Cellular component
40S ribosomal protein S13-1	RS131_ARATH	Arabidopsis thaliana	17 kDa	0.16	-0.25	GO:0005730, GO:0005794, GO:0005829, GO:0009507, GO:0022626, GO:0022627	Cellular component
Protein argonaute 4A	AGO4A_ORYSJ	Oryza sativa subsp. japonica	101 kDa	0.29	-0.15	NA	Cellular component
Putative uncharacterized protein	A9P8E9_POPTR	Populus trichocarpa	16 kDa	0.44	0.17	GO:0005840, GO:0022627	Cellular component
40S ribosomal protein S14	RS142_MAIZE	Zea mays	16 kDa	0.073	-0.24	GO:0005840	Cellular component
Guanine nucleotide-binding family protein	D7L7Z8_ARALL	Arabidopsis lyrata subsp. lyrata	36 kDa	0.25	-0.15	GO:0005730	Cellular component
Uncharacterized protein (60S ribosomal protein L7 )	M5XTN9_PRUPE	Prunus persica	28 kDa	0.14	-0.18	GO:0005773, GO:0005774, GO:0005829, GO:0005840, GO:0005886, GO:0009507, GO:0022625, GO:0022625, GO:0022626, GO:0042788	Cellular component
4-hydroxy-3-methylbut-2-en-1-yl diphosphate synthase	K7NBL1_SIRGR	Siraitia grosvenorii	82 kDa	0.7	-0.13	NA	Cellular component
Pyruvate kinase	B7FLG2_MEDTR	Medicago truncatula	54 kDa	0.7	0.05	NA	Cellular component
Putative uncharacterized protein	F6GWF3_VITVI	Vitis vinifera	52 kDa	0.7	0.18	NA	Cellular component
Cysteine protease inhibitor (Fragment)	G0ZS05_CUCMA	Cucurbita maxima	11 kDa	0.034	0.44	NA	Cellular component
Phenylalanine ammonia-lyase 2	PAL2_LITER	Lithospermum erythrorhizon	77 kDa	0.00046	1.46	GO:0005737	Cellular component
Adenylosuccinate synthetase 2, chloroplastic	PURA2_RICCO	Ricinus communis	53 kDa	0.67	-0.01	GO:0009507, GO:0009536	Cellular component
Fumarate hydratase 1, mitochondrial	FUM1_ARATH	Arabidopsis thaliana	53 kDa	0.087	-0.35	GO:0005739, GO:0045239	Cellular component
Nitrate reductase [NADH]	NIA_CUCMA	Cucurbita maxima	103 kDa	0.11	-0.22	NA	Cellular component
Putative uncharacterized protein	C6T531_SOYBN	Glycine max	21 kDa	0.57	-0.04	GO:0005840	Cellular component
Ubiquinol oxidase	D4P4J8_CITLA	Citrullus lanatus	40 kDa	0.066	-0.44	GO:0016021, GO:0070469	Cellular component
Putative uncharacterized protein	A9NK66_PICSI	Picea sitchensis	5 kDa	0.44	0.42	NA	Cellular component
Ras-related protein RABA1b	RAA1B_ARATH	Arabidopsis thaliana	24 kDa	0.32	-0.17	GO:0005768, GO:0005773, GO:0005774, GO:0005829, GO:0005886, GO:0009504	Cellular component
Uncharacterized protein	I1N1M0_SOYBN	Glycine max	58 kDa	0.7	-0.07	GO:0005737	Cellular component
6-phosphofructokinase 5, chloroplastic	K6PF5_ARATH	Arabidopsis thaliana	59 kDa	0.78	-0.03	NA	Cellular component
Dihydrolipoyl dehydrogenase, mitochondrial	DLDH_PEA	Pisum sativum	53 kDa	0.012	-0.41	GO:0005739, GO:0005759, GO:0005960	Cellular component
Uncharacterized protein	R0IC76_9BRAS	Capsella rubella	61 kDa	0.2	-0.19	GO:0005737	Cellular component
Putative uncharacterized protein Sb03g029720	C5XF87_SORBI	Sorghum bicolor	63 kDa	0.24	-0.13	NA	Cellular component
Csf-1 protein (Fragment)	Q9SXL9_CUCSA	Cucumis sativus	16 kDa	0.7	0.78	GO:0005840	Cellular component
Phosphoglycerate kinase (Fragment)	G8EW39_9POAL	Kengyilia alatavica	31 kDa	0.7	-0.04	NA	Cellular component
Putative uncharacterized protein	F6GXU4_VITVI	Vitis vinifera	128 kDa	0.053	0.55	GO:0005737, GO:0016021	Cellular component
Ubiquitin-activating enzyme E1 3	UBE13_WHEAT	Triticum aestivum	116 kDa	0.4	-0.08	NA	Cellular component
Proteasome subunit alpha type	A5AXI5_VITVI	Vitis vinifera	27 kDa	0.12	0.6	GO:0005634, GO:0005737	Cellular component
Probable 26S proteasome non-ATPase regulatory subunit 3	PSMD3_TOBAC	Nicotiana tabacum	56 kDa	0.19	-0.22	GO:0005634	Cellular component
Predicted protein	B9HRZ1_POPTR	Populus trichocarpa	113 kDa	0.1	-0.23	NA	Cellular component
Putative uncharacterized protein	A2XVU7_ORYSI	Oryza sativa subsp. indica	55 kDa	0.26	0.24	NA	Cellular component
Elongation factor Tu, chloroplastic	EFTU1_SOYBN	Glycine max	52 kDa	0.011	0.2	GO:0009507, GO:0009536	Cellular component
Putative glyoxysomal fatty acid beta-oxidation multifunctional protein	B1Q485_CAPCH	Capsicum chinense	79 kDa	0.26	-0.27	NA	Cellular component
Superoxide dismutase (Fragment)	Q6QGY4_CITLA	Citrullus lanatus	16 kDa	0.16	0.2	NA	Cellular component
40S ribosomal protein S16	RS16_GOSHI	Gossypium hirsutum	16 kDa	0.26	-0.2	GO:0005840	Cellular component
Putative uncharacterized protein	B7FN60_MEDTR	Medicago truncatula	19 kDa	0.25	0.47	GO:0009507, GO:0009570	Cellular component
Glycine--tRNA ligase 1, mitochondrial	SYGM1_ARATH	Arabidopsis thaliana	82 kDa	0.17	0.1	GO:0005739, GO:0005768, GO:0005794, GO:0005802, GO:0005829	Cellular component
Predicted protein	A9PBR7_POPTR	Populus trichocarpa	21 kDa	0.7	0	GO:0005840, GO:0022625	Cellular component
Predicted protein	B9IBF2_POPTR	Populus trichocarpa	45 kDa	0.6	-0.15	GO:0005739	Cellular component
Peptidyl-prolyl cis-trans isomerase	CYPX_USEUD	Unspecified eudicot	18 kDa	0.2	0.33	GO:0005737	Cellular component
Uncharacterized protein	M0ZY64_SOLTU	Solanum tuberosum	38 kDa	0.7	0.05	NA	Cellular component
Spermidine synthase 1	SPD1_HYONI	Hyoscyamus niger	35 kDa	0.25	-0.13	NA	Cellular component
Adenylate kinase A	KAD1_ORYSJ	Oryza sativa subsp. japonica	26 kDa	0.44	-0.18	GO:0005739, GO:0009507, GO:0009570	Cellular component
Glutathione peroxidase	B9RCA6_RICCO	Ricinus communis	19 kDa	0.67	0.47	NA	Cellular component
TCP domain class transcription factor	D9ZJD1_MALDO	Malus domestica	57 kDa	0.4	0.05	GO:0005737	Cellular component
Proteasome subunit alpha type	A5C3G9_VITVI	Vitis vinifera	31 kDa	0.57	-0.02	GO:0005634, GO:0005737	Cellular component
Proteasome subunit alpha type-4	PSA4_PETHY	Petunia hybrida	27 kDa	0.32	0.09	GO:0005634, GO:0005737	Cellular component
Malate dehydrogenase, glyoxysomal	MDHG_CITLA	Citrullus lanatus	38 kDa	0.76	-0.02	GO:0009514	Cellular component
Coatomer subunit beta	I1KG56_SOYBN	Glycine max	106 kDa	0.25	0.46	GO:0000139, GO:0005794, GO:0030663, GO:0031410	Cellular component
Fumarylacetoacetate hydrolase, putative	B9S3J5_RICCO	Ricinus communis	46 kDa	0.44	0.1	NA	Cellular component
Putative uncharacterized protein	A5AEB0_VITVI	Vitis vinifera	47 kDa	0.76	0.02	NA	Cellular component
Uncharacterized protein	I1L117_SOYBN	Glycine max	87 kDa	0.09	-0.46	NA	Cellular component
Acyl-coenzyme A oxidase, peroxisomal	ACOX2_CUCMA	Cucurbita maxima	77 kDa	0.32	-0.41	GO:0009514	Cellular component
Predicted protein	B9HU92_POPTR	Populus trichocarpa	43 kDa	0.89	0.11	GO:0043231	Cellular component
40S ribosomal protein S6	A2XHI9_ORYSI	Oryza sativa subsp. indica	29 kDa	1	0.05	GO:0005840	Cellular component
Probable phospholipid hydroperoxide glutathione peroxidase	GPX4_GOSHI	Gossypium hirsutum	19 kDa	0.39	0.1	GO:0005737	Cellular component
Dimeric phloem specific lectin PP2	Q42383_CUCMA	Cucurbita maxima	24 kDa	0.011	0.36	NA	Cellular component
Uncharacterized protein	M5XHS7_PRUPE	Prunus persica	15 kDa	0.7	0.2	GO:0005840	Cellular component
Uncharacterized protein	M0SJM4_MUSAM	Musa acuminata subsp. malaccensis	57 kDa	0.4	0.23	NA	Cellular component
Calreticulin-2	CALR2_ARATH	Arabidopsis thaliana	48 kDa	0.44	0.17	GO:0005739, GO:0005773, GO:0005783, GO:0005788, GO:0005794, GO:0048046	Cellular component
Uncharacterized protein	B4FZU5_MAIZE	Zea mays	24 kDa	0.7	0.05	GO:0005777	Cellular component
60S ribosomal protein L8-1	RL81_ARATH	Arabidopsis thaliana	28 kDa	0.94	-0.02	GO:0005730, GO:0005773, GO:0005774, GO:0005794, GO:0005829, GO:0005886, GO:0009507, GO:0015934, GO:0022625, GO:0022625, GO:0022626, GO:0042788	Cellular component
Putative uncharacterized protein	A5BL32_VITVI	Vitis vinifera	40 kDa	0.25	-0.16	NA	Cellular component
Alcohol dehydrogenase class-3	ADHX_PEA	Pisum sativum	40 kDa	0.16	-0.19	GO:0005737	Cellular component
NADH-ubiquinone oxidoreductase flavoprotein	E5GBX7_CUCME	Cucumis melo subsp. melo	53 kDa	0.21	-0.1	GO:0005739, GO:0005743, GO:0005747, GO:0016020, GO:0070469	Cellular component
Glutamate-1-semialdehyde 21-aminomutase	E5GCQ7_CUCME	Cucumis melo subsp. melo	50 kDa	0.44	0.15	NA	Cellular component
Putative uncharacterized protein	A5C9G0_VITVI	Vitis vinifera	18 kDa	0.01	-0.7	GO:0005840, GO:0022625	Cellular component
Importin subunit alpha	K4AWF0_SOLLC	Solanum lycopersicum	59 kDa	0.056	0.22	GO:0005634, GO:0005643, GO:0005654, GO:0005737, GO:0005829	Cellular component
ADP,ATP carrier protein 1, chloroplastic	TLC1_ARATH	Arabidopsis thaliana	68 kDa	0.048	-0.7	GO:0009507, GO:0009536, GO:0009941, GO:0016021, GO:0031969	Cellular component
V-type proton ATPase subunit D	VATD_ARATH	Arabidopsis thaliana	29 kDa	0.89	0.03	GO:0000325, GO:0005774, GO:0005794, GO:0005886	Cellular component
Uncharacterized protein	C6TJL2_SOYBN	Glycine max	44 kDa	0.32	-0.05	GO:0005634, GO:0005829	Cellular component
Late-embryogenesis abundant protein 2	C6T750_SOYBN	Glycine max	34 kDa	0.79	0.02	GO:0005794, GO:0005829, GO:0005886, GO:0016020	Cellular component
Putative uncharacterized protein	F6I5Y5_VITVI	Vitis vinifera	69 kDa	0.12	-0.62	GO:0005739, GO:0009507, GO:0009570, GO:0016020	Cellular component
Xylose isomerase	D7MNC2_ARALL	Arabidopsis lyrata subsp. lyrata	54 kDa	0.053	-0.41	GO:0005773, GO:0005774, GO:0005783, GO:0005783, GO:0005794	Cellular component
NADH dehydrogenase subunit 7	D5I3D0_CITLA	Citrullus lanatus	45 kDa	0.055	-0.2	GO:0005739, GO:0070469	Cellular component
Succinate dehydrogenase	E5GCD7_CUCME	Cucumis melo subsp. melo	31 kDa	0.48	0.05	GO:0005739, GO:0005743	Cellular component
V-type proton ATPase subunit E	VATE_MESCR	Mesembryanthemum crystallinum	26 kDa	0.48	0.07	GO:0033178	Cellular component
Glycolate oxidase	Q39640_9ROSI	Cucurbita cv. Kurokawa Amakuri	40 kDa	0.67	-0.01	GO:0005777	Cellular component
Predicted protein	D7LXS6_ARALL	Arabidopsis lyrata subsp. lyrata	59 kDa	0.78	0.66	GO:0005829, GO:0005832, GO:0016020	Cellular component
Uncharacterized protein	I1JIN5_SOYBN	Glycine max	71 kDa	0.12	0.39	GO:0005886, GO:0016020, GO:0016021	Cellular component
Thylakoid-bound ascorbate peroxidase (Precursor)	O04873_9ROSI	Cucurbita cv. Kurokawa Amakuri	46 kDa	0.92	0.02	GO:0009533, GO:0016021	Cellular component
Probable pre-mRNA-splicing factor ATP-dependent RNA helicase	DHX15_ARATH	Arabidopsis thaliana	83 kDa	0.1	-0.29	NA	Cellular component
Putative uncharacterized protein	D7SY46_VITVI	Vitis vinifera	60 kDa	0.7	-0.1	NA	Cellular component
Diphosphomevalonate decarboxylase	K7NBV8_SIRGR	Siraitia grosvenorii	46 kDa	0.016	-0.26	GO:0005829	Cellular component
Uncharacterized protein	K7KRS4_SOYBN	Glycine max	52 kDa	0.16	-0.18	GO:0005737	Cellular component
Putative uncharacterized protein	A2Y6U4_ORYSI	Oryza sativa subsp. indica	54 kDa	0.57	-0.06	NA	Cellular component
Arginine biosynthesis bifunctional protein ArgJ, chloroplastic	ARGJ_CITLA	Citrullus lanatus	48 kDa	0.48	-0.14	GO:0009507, GO:0009536	Cellular component
Proteasome subunit beta type	C6TLJ9_SOYBN	Glycine max	29 kDa	0.4	0.09	GO:0005634, GO:0005737	Cellular component
Glucose-6-phosphate 1-dehydrogenase 2, chloroplastic	G6PD2_ARATH	Arabidopsis thaliana	67 kDa	0.48	-0.12	GO:0009507, GO:0009536, GO:0009570, GO:0009570	Cellular component
Eukaryotic translation initiation factor 6	D7LV66_ARALL	Arabidopsis lyrata subsp. lyrata	27 kDa	0.26	0.12	GO:0005634, GO:0005730, GO:0005737, GO:0005829	Cellular component
Inosine-5'-monophosphate dehydrogenase	A7XZM6_CAMSI	Camellia sinensis	53 kDa	0.67	0.01	GO:0005737	Cellular component
Ferredoxin--nitrite reductase	B6SY01_MAIZE	Zea mays	66 kDa	0.053	-0.74	NA	Cellular component
Malic enzyme	K4CLL3_SOLLC	Solanum lycopersicum	65 kDa	0.7	-0.38	GO:0009507	Cellular component
NADP-dependent malic enzyme	MAOX_POPTR	Populus trichocarpa	65 kDa	0.44	-0.13	GO:0005737	Cellular component
Predicted protein	B9HX41_POPTR	Populus trichocarpa	21 kDa	0.57	0.07	GO:0005737	Cellular component
Superoxide dismutase [Cu-Zn]	A8CF89_POPAL	Populus alba	22 kDa	0.0047	0.84	GO:0009507	Cellular component
Cytochrome b-c1 complex subunit Rieske, mitochondrial	UCRI_SOLTU	Solanum tuberosum	29 kDa	0.0047	-0.45	GO:0005739, GO:0005743, GO:0016021, GO:0070469	Cellular component
Putative uncharacterized protein	A5AS18_VITVI	Vitis vinifera	22 kDa	0.48	0.16	GO:0005737, GO:0005886	Cellular component
Neutral alpha-glucosidase ab, putative	B9S1M1_RICCO	Ricinus communis	111 kDa	0.12	0.28	NA	Cellular component
60S ribosomal protein L13	A5CB91_VITVI	Vitis vinifera	24 kDa	0.31	-0.29	GO:0005840	Cellular component
NADH dehydrogenase [ubiquinone] iron-sulfur protein 7, mitochondrial	NDUS7_ARATH	Arabidopsis thaliana	24 kDa	0.89	0.01	GO:0005739, GO:0005747, GO:0070469	Cellular component
Putative uncharacterized protein	B7FMA7_MEDTR	Medicago truncatula	22 kDa	0.25	-0.31	GO:0005783, GO:0005794	Cellular component
GTP-binding protein SAR1	SAR1_TOBAC	Nicotiana tabacum	23 kDa	0.7	-0.03	GO:0005783, GO:0005794	Cellular component
Chloroplast transketolase	G8EX76_CUCSA	Cucumis sativus	81 kDa	0.053	0.86	NA	Cellular component
Putative uncharacterized protein	B7FJA2_MEDTR	Medicago truncatula	26 kDa	0.89	0.17	GO:0016021	Cellular component
Phospholipase D alpha 1	PLDA1_VIGUN	Vigna unguiculata	92 kDa	0.36	0.11	GO:0016020	Cellular component
Beta-adaptin-like protein B	APBLB_ARATH	Arabidopsis thaliana	99 kDa	0.056	-0.27	GO:0005794, GO:0016020, GO:0030117, GO:0030131, GO:0030665, GO:0031410	Cellular component
Ribulose bisphosphate carboxylase large chain (Fragment)	RBL_ERICA	Eriodictyon californicum	52 kDa	0.48	0.14	GO:0009507	Cellular component
Putative uncharacterized protein	A5BGG6_VITVI	Vitis vinifera	32 kDa	0.034	0.95	GO:0005634, GO:0005829	Cellular component
Peptidyl-prolyl cis-trans isomerase FKBP12	FKB12_VICFA	Vicia faba	12 kDa	0.066	-0.33	GO:0005737	Cellular component
Uncharacterized protein	I1KPV1_SOYBN	Glycine max	55 kDa	0.056	-0.35	GO:0005743	Cellular component
Cysteine synthase	CYSK_CITLA	Citrullus lanatus	34 kDa	0.57	0.16	GO:0005737	Cellular component
Uncharacterized protein	K7MK66_SOYBN	Glycine max	107 kDa	0.48	0.08	NA	Cellular component
UTP--glucose-1-phosphate uridylyltransferase	UGPA_SOLTU	Solanum tuberosum	52 kDa	0.78	0.05	GO:0005737	Cellular component
Probable aldo-keto reductase 2	AKR2_ORYSI	Oryza sativa subsp. indica	38 kDa	0.048	0.23	NA	Cellular component
Serine hydroxymethyltransferase, mitochondrial	GLYM_PEA	Pisum sativum	57 kDa	0.01	-0.37	GO:0005739	Cellular component
Uncharacterized protein	M5XQ24_PRUPE	Prunus persica	48 kDa	0.32	0.09	NA	Cellular component
DEAD-box ATP-dependent RNA helicase 15	RH15_ARATH	Arabidopsis thaliana	48 kDa	0.84	-0.02	GO:0005634, GO:0005681, GO:0005730, GO:0005737, GO:0005829	Cellular component
Pyrroline-5-carboxylate synthetase	G3M0R4_CUCME	Cucumis melo	78 kDa	0.74	0.1	GO:0005737	Cellular component
Ras-related protein Rab7	RAB7_SOYBN	Glycine max	23 kDa	0.44	-0.22	GO:0005886, GO:0016020	Cellular component
Predicted protein (Ferredoxin-dependent glutamate synthase)	B9IHR5_POPTR	Populus trichocarpa	163 kDa	0.053	0.22	GO:0005737	Cellular component
Acetyl-CoA C-acyltransferase (3-ketoacyl-coa thiolase b) (Fragment)	Q42918_MANIN	Mangifera indica	45 kDa	0.7	-0.73	NA	Cellular component
Glutathione reductase	I6P8E9_9ROSI	Dimocarpus longan	60 kDa	0.011	0.77	NA	Cellular component
Chloroplast NADP-dependent glyceraldehyde 3-phosphate dehydrogenase B subunit (Fragment)	Q9FV16_CUCPE	Cucurbita pepo	18 kDa	0.36	-0.15	NA	Cellular component
Putative uncharacterized protein	A5ASG9_VITVI	Vitis vinifera	58 kDa	0.32	0.41	GO:0005634, GO:0005737	Cellular component
Uncharacterized protein	I1JMZ4_SOYBN	Glycine max	22 kDa	0.36	0.19	GO:0005854	Cellular component
Alcohol dehydrogenase class-3	ADHX_ARATH	Arabidopsis thaliana	41 kDa	0.4	-0.24	GO:0005737	Cellular component
T-complex protein 1 subunit epsilon	TCPE_ARATH	Arabidopsis thaliana	59 kDa	0.52	0.26	GO:0005829, GO:0005832, GO:0005886	Cellular component
40S ribosomal protein S11	RS11_MAIZE	Zea mays	18 kDa	0.048	-0.85	GO:0005840	Cellular component
Phospho-2-dehydro-3-deoxyheptonate aldolase 1, chloroplast, putative	B9T0A7_RICCO	Ricinus communis	59 kDa	0.78	0.02	GO:0009507	Cellular component
Uncharacterized protein	I1JGP8_SOYBN	Glycine max	60 kDa	0.16	0.28	GO:0005737	Cellular component
Uncharacterized protein	M0RVC5_MUSAM	Musa acuminata subsp. malaccensis	14 kDa	0.44	0.12	GO:0005840	Cellular component
Ras-related protein RABA4a	RAA4A_ARATH	Arabidopsis thaliana	25 kDa	0.78	-0.07	GO:0005768, GO:0005794, GO:0005886	Cellular component
Proteasome subunit beta type-2-B	PSB2B_ARATH	Arabidopsis thaliana	22 kDa	0.89	0.05	GO:0005634, GO:0005737	Cellular component
Uncharacterized protein	I1JGR4_SOYBN	Glycine max	86 kDa	0.72	0.09	NA	Cellular component
60S ribosomal protein L10-1	RL101_ORYSI	Oryza sativa subsp. indica	25 kDa	0.09	-0.42	GO:0005840	Cellular component
Ketol-acid reductoisomerase, chloroplastic	ILV5_PEA	Pisum sativum	63 kDa	0.26	-0.34	GO:0009507, GO:0009536	Cellular component
Uridine kinase	B9GJS2_POPTR	Populus trichocarpa	54 kDa	0.44	-0.07	GO:0005829, GO:0009507	Cellular component
Putative uncharacterized protein	D8RV35_SELML	Selaginella moellendorffii	71 kDa	1	-0.31	NA	Cellular component
Alpha-1,4-glucan-protein synthase [UDP-forming]	UPTG_MAIZE	Zea mays	41 kDa	0.0081	-0.23	GO:0005794	Cellular component
Ketol-acid reductoisomerase, chloroplastic	ILV5_ORYSJ	Oryza sativa subsp. japonica	62 kDa	0.013	-0.41	GO:0009507	Cellular component
U5 small nuclear ribonucleoprotein 200 kDa helicase	G7IJ55_MEDTR	Medicago truncatula	252 kDa	0.7	0.66	NA	Cellular component
Putative uncharacterized protein	B8LLU9_PICSI	Picea sitchensis	82 kDa	0.12	-0.36	GO:0005694	Cellular component
DEAD-box ATP-dependent RNA helicase 2	RH2_ARATH	Arabidopsis thaliana	46 kDa	0.7	0.09	GO:0005634, GO:0005654, GO:0005730, GO:0005737, GO:0016020, GO:0016607, GO:0035145, GO:0071013	Cellular component
Predicted protein	B9H9T9_POPTR	Populus trichocarpa	104 kDa	0.48	0.1	NA	Cellular component
Predicted protein	B9GSH1_POPTR	Populus trichocarpa	35 kDa	0.4	0.2	GO:0005634	Cellular component
Uncharacterized protein	M4DUK0_BRARP	Brassica rapa subsp. pekinensis	22 kDa	0.67	0.04	GO:0015934	Cellular component
GDP-D-mannose-3',5'-epimerase	A0EJL8_MALGL	Malpighia glabra	43 kDa	0.32	-0.16	NA	Cellular component
Protein grpE, putative	B9SYX8_RICCO	Ricinus communis	34 kDa	0.23	-0.27	GO:0005739, GO:0005759	Cellular component
Phosphoribosylformylglycinamidine cyclo-ligase	A9S752_PHYPA	Physcomitrella patens subsp. patens	35 kDa	0.0072	0.34	GO:0005737	Cellular component
Cysteine synthase	A8ISA9_CHLRE	Chlamydomonas reinhardtii	38 kDa	0.25	-0.7	GO:0005737	Cellular component
Proteasome subunit beta type	B7FH05_MEDTR	Medicago truncatula	23 kDa	1	0	NA	Cellular component
Cysteine synthase	A9PJI4_9ROSI	Populus trichocarpa x Populus deltoides	43 kDa	0.44	0.18	NA	Cellular component
Succinyl-CoA ligase [ADP-forming] subunit alpha-1, mitochondrial	SUCA1_SOLLC	Solanum lycopersicum	35 kDa	0.53	0.05	GO:0005739, GO:0005759	Cellular component
DNA damage-binding protein 1a	DDB1A_ARATH	Arabidopsis thaliana	121 kDa	0.39	-0.23	GO:0005634, GO:0005829	Cellular component
Eukaryotic translation initiation factor 3 subunit D	B9H2U0_POPTR	Populus trichocarpa	63 kDa	0.24	-0.15	GO:0005737, GO:0005852	Cellular component
Putative uncharacterized protein	B8LR96_PICSI	Picea sitchensis	68 kDa	0.7	0.17	GO:0005852	Cellular component
Uncharacterized protein	M5XKS7_PRUPE	Prunus persica	98 kDa	0.011	0.39	NA	Cellular component
NADP-dependent malic enzyme 4, chloroplastic	MAOP4_ARATH	Arabidopsis thaliana	71 kDa	0.78	-0.14	GO:0009507	Cellular component
Serine-threonine protein kinase, plant-type, putative	B9RI89_RICCO	Ricinus communis	40 kDa	0.57	-0.03	NA	Cellular component
Predicted protein	B9GI44_POPTR	Populus trichocarpa	86 kDa	0.14	0.2	GO:0005730, GO:0005737	Cellular component
Glucose-6-phosphate 1-dehydrogenase, cytoplasmic isoform 1	G6PD5_ARATH	Arabidopsis thaliana	59 kDa	0.16	-0.24	GO:0005829, GO:0009507	Cellular component
Phenylalanine ammonia-lyase (Fragment)	Q43211_WHEAT	Triticum aestivum	37 kDa	0.053	1.67	GO:0005737	Cellular component
Eukaryotic peptide chain release factor subunit 1-1	ERF1X_ARATH	Arabidopsis thaliana	49 kDa	0.94	0.01	GO:0005737	Cellular component
Peroxisomal (S)-2-hydroxy-acid oxidase GLO5	GLO5_ORYSI	Oryza sativa subsp. indica	40 kDa	0.7	0.24	GO:0005777	Cellular component
Uncharacterized protein	M5VQX2_PRUPE	Prunus persica	27 kDa	0.26	0.11	GO:0005634, GO:0005737	Cellular component
Proteasome subunit alpha type-7	PSA7_CICAR	Cicer arietinum	27 kDa	0.12	0.2	GO:0005634, GO:0005737	Cellular component
Formate dehydrogenase, mitochondrial	FDH_HORVU	Hordeum vulgare	42 kDa	0.57	-0.34	GO:0005739	Cellular component
Transketolase, chloroplastic	TKTC_SPIOL	Spinacia oleracea	80 kDa	0.89	0.05	GO:0009507, GO:0009535, GO:0016020	Cellular component
Coatomer subunit gamma-2	COPG2_ORYSJ	Oryza sativa subsp. japonica	99 kDa	0.78	0.08	GO:0005794, GO:0030126, GO:0030663, GO:0031410	Cellular component
Uncharacterized protein	K4CMS0_SOLLC	Solanum lycopersicum	120 kDa	0.7	-0.14	GO:0009507	Cellular component
Probable protein phosphatase 2C 10	P2C10_ORYSJ	Oryza sativa subsp. japonica	38 kDa	0.028	0.11	GO:0016021	Cellular component
Putative pyruvate dehydrogenase E3 subunit	B5LAW5_CAPAN	Capsicum annuum	61 kDa	1	0.03	NA	Cellular component
Leucine aminopeptidase, chloroplastic	AMPL_SOLTU	Solanum tuberosum	60 kDa	0.94	0.04	GO:0009507	Cellular component
Predicted protein (Fragment)	B9NDN5_POPTR	Populus trichocarpa	86 kDa	0.72	-0.2	NA	Cellular component
Uncharacterized protein	K4CBF0_SOLLC	Solanum lycopersicum	60 kDa	0.7	0.16	GO:0005759, GO:0045254	Cellular component
