# Supplementary material for: Sex-Dependent Variation of Pumpkin (Cucurbita maxima cv. Big Max) Nectar and Nectaries as Determined by Proteomics and Metabolomics
Source: Front Plant Sci. 2018 Jun 29;9:860. doi: 10.3389/fpls.2018.00860 (PMC6034135; doi:10.3389/fpls.2018.00860)
Supplement: Supplementary file 5 [file Data_Sheet_5.XLSX]

## Sheet: Fisher_Results_All
Supplementary Table 5	Enriched GO terms as determined by a Fisher's exact test for female and male proteins with differential expression
GO_ID	Fisher's Exact Test p-value	Ontology	Analysis Test Group
GO:0044765	0.017	BP	Female enriched (25 proteins)
GO:1902578	0.017	BP	Female enriched (25 proteins)
GO:0051179	0.049	BP	Female enriched (25 proteins)
GO:0098655	0.031	BP	Female enriched (25 proteins)
GO:0098662	0.031	BP	Female enriched (25 proteins)
GO:1902600	0.031	BP	Female enriched (25 proteins)
GO:0055085	0.036	BP	Female enriched (25 proteins)
GO:0034220	0.041	BP	Female enriched (25 proteins)
GO:0098660	0.041	BP	Female enriched (25 proteins)
GO:0006810	0.044	BP	Female enriched (25 proteins)
GO:0051234	0.044	BP	Female enriched (25 proteins)
GO:0015988	0.047	BP	Female enriched (25 proteins)
GO:0015991	0.047	BP	Female enriched (25 proteins)
GO:0090662	0.047	BP	Female enriched (25 proteins)
GO:0009414	0.047	BP	Female enriched (25 proteins)
GO:0009415	0.047	BP	Female enriched (25 proteins)
GO:0022891	0.0057	MF	Female enriched (25 proteins)
GO:0022892	0.0111	MF	Female enriched (25 proteins)
GO:0005215	0.0242	MF	Female enriched (25 proteins)
GO:0022857	0.0147	MF	Female enriched (25 proteins)
GO:0008324	0.0162	MF	Female enriched (25 proteins)
GO:0015078	0.0162	MF	Female enriched (25 proteins)
GO:0022890	0.0162	MF	Female enriched (25 proteins)
GO:0015075	0.0232	MF	Female enriched (25 proteins)
GO:0015077	0.0162	MF	Female enriched (25 proteins)
GO:0016830	0.0232	MF	Female enriched (25 proteins)
GO:0016831	0.0107	MF	Female enriched (25 proteins)
GO:0004611	0.0155	MF	Female enriched (25 proteins)
GO:0000287	0.0242	MF	Female enriched (25 proteins)
GO:0031224	0.03651	CC	Female enriched (25 proteins)
GO:0016021	0.03651	CC	Female enriched (25 proteins)
GO:0044444	0.00099	CC	Female enriched (25 proteins)
GO:0005829	0.04499	CC	Female enriched (25 proteins)
GO:0009698	0.0074	BP	Male enriched (20 proteins)
GO:0009699	0.0074	BP	Male enriched (20 proteins)
GO:0009803	0.0026	BP	Male enriched (20 proteins)
GO:0009800	0.0026	BP	Male enriched (20 proteins)
GO:1901565	0.0233	BP	Male enriched (20 proteins)
GO:0016054	0.0233	BP	Male enriched (20 proteins)
GO:0046395	0.0144	BP	Male enriched (20 proteins)
GO:0009063	0.0074	BP	Male enriched (20 proteins)
GO:0006558	0.0074	BP	Male enriched (20 proteins)
GO:0006559	0.0074	BP	Male enriched (20 proteins)
GO:0072330	0.0233	BP	Male enriched (20 proteins)
GO:0019748	0.0144	BP	Male enriched (20 proteins)
GO:0044550	0.0144	BP	Male enriched (20 proteins)
GO:0048519	0.0144	BP	Male enriched (20 proteins)
GO:0048523	0.0026	BP	Male enriched (20 proteins)
GO:0044802	0.0144	BP	Male enriched (20 proteins)
GO:0061024	0.0144	BP	Male enriched (20 proteins)
GO:0065009	0.0339	BP	Male enriched (20 proteins)
GO:0050790	0.0339	BP	Male enriched (20 proteins)
GO:0009636	0.046	BP	Male enriched (20 proteins)
GO:0098754	0.046	BP	Male enriched (20 proteins)
GO:1990748	0.046	BP	Male enriched (20 proteins)
GO:0098869	0.046	BP	Male enriched (20 proteins)
GO:0009408	0.0144	BP	Male enriched (20 proteins)
GO:0016840	0.0107	MF	Male enriched (20 proteins)
GO:0016841	0.0107	MF	Male enriched (20 proteins)
GO:0045548	0.0037	MF	Male enriched (20 proteins)
GO:0019904	0.0207	MF	Male enriched (20 proteins)
GO:0098772	0.0332	MF	Male enriched (20 proteins)
GO:0030234	0.0332	MF	Male enriched (20 proteins)
